# Supplementary material for: Super-resolution microscopy compatible fluorescent probes reveal endogenous glucagon-like peptide-1 receptor distribution and dynamics
Source: PubMed Central journal article supplement (PMC6981144; doi:10.1038/s41467-020-14309-w), 2020-01-24
Supplement: 41467_2020_14309_MOESM1_ESM.pdf [file 41467_2020_14309_MOESM1_ESM.pdf]

## SUPPLEMENTARY INFORMATION

### Super-resolution microscopy compatible fluorescent probes reveal endogenous glucagon-like peptide-1 receptor distribution and dynamics

Julia Ast<sup>1,2</sup>, Anastasia Arvaniti<sup>1,2</sup>, Nicholas H.F. Fine<sup>1,2</sup>, Daniela Nasteska<sup>1,2</sup>, Fiona B. Ashford<sup>1,2</sup>, Zania Stamataki<sup>3</sup>, Zsombor Koszegi<sup>1,2</sup>, Andrea Bacon<sup>4</sup>, Ben J. Jones<sup>5</sup>, Maria A. Lucey<sup>5</sup>, Shugo Sasaki<sup>6</sup>, Daniel I. Brierley<sup>7</sup>, Benoit Hastoy<sup>8</sup>, Alejandra Tomas<sup>9</sup>, Giuseppe D'Agostino<sup>10</sup>, Frank Reimann<sup>11</sup>, Francis C. Lynn<sup>6</sup>, Christopher A. Reissaus<sup>12</sup>, Amelia K. Linnemann<sup>12</sup>, Elisa D'Este<sup>13</sup>, Davide Calebiro<sup>1,2</sup>, Stefan Trapp<sup>7</sup>, Kai Johnsson<sup>14</sup>, Tom Podewin<sup>14\*</sup>, Johannes Broichhagen<sup>14\*</sup> and David J. Hodson<sup>1,2\*</sup>

<sup>1</sup> Institute of Metabolism and Systems Research (IMSR), and Centre of Membrane Proteins and Receptors (COMPARE), University of Birmingham, Birmingham, UK.

<sup>2</sup> Centre for Endocrinology, Diabetes and Metabolism, Birmingham Health Partners, Birmingham, UK.

<sup>3</sup> Centre for Liver Research, College of Medical and Dental Sciences, Institute for Immunology and Immunotherapy, University of Birmingham, Birmingham, UK.

<sup>4</sup> Genome Editing Facility, Technology Hub, University of Birmingham, Birmingham, UK.

<sup>5</sup> Imperial College London, Section of Investigative Medicine, Division of Diabetes, Endocrinology and Metabolism, London, UK.

<sup>6</sup> Diabetes Research Group, BC Children's Hospital Research Institute, Vancouver, BC, Canada; Department of Surgery, University of British Columbia, Vancouver, BC, Canada.

<sup>7</sup> Centre for Cardiovascular and Metabolic Neuroscience, Department of Neuroscience, Physiology & Pharmacology, University College London, London, UK

<sup>8</sup> Oxford Centre for Diabetes, Endocrinology & Metabolism, University of Oxford, Oxford, UK.

<sup>9</sup> Imperial College London, Section of Cell Biology and Functional Genomics, Division of Diabetes, Endocrinology and Metabolism, London, UK.

<sup>10</sup> Faculty of Biology, Medicine and Health, University of Manchester, Oxford Road, Manchester, UK.

<sup>11</sup> Wellcome Trust-MRC Institute of Metabolic Science, University of Cambridge, Cambridge, U.K

<sup>12</sup> Department of Pediatrics, Indiana University School of Medicine, Indianapolis, IN, USA.

<sup>13</sup> Optical Microscopy Facility, Max Planck Institute for Medical Research, Heidelberg, Germany.

<sup>14</sup> Department of Chemical Biology, Max Planck Institute for Medical Research, Heidelberg, Germany.

\*Correspondence should be addressed to: [d.hodson@bham.ac.uk](mailto:d.hodson@bham.ac.uk), [johannes.broichhagen@mr.mpg.de](mailto:johannes.broichhagen@mr.mpg.de) or [tom.podewin@mpimf-heidelberg.mpg.de](mailto:tom.podewin@mpimf-heidelberg.mpg.de)

## SUPPLEMENTARY METHODS

### General chemistry

Solvents for chromatography and reactions were purchased HPLC grade (Sigma-Aldrich, 99.8%, extra dry over molecular sieves). If necessary, solvents were degassed either by freeze-pump-thaw or by bubbling N<sub>2</sub> through the vigorously stirred solution for several minutes. Unless otherwise stated, all other reagents were used without further purification from commercial sources.

LC-MS was performed on a Shimadzu MS2020 connected to a Nexera UHPLC system equipped with a Waters ACQUITY UPLC BEH C18 (1.7 μm, 50 × 2.1 mm). Buffer A: 0.1% FA in H<sub>2</sub>O Buffer B: acetonitrile. The typical gradient was from 10% B for 0.5 min → gradient to 90% B over 4.5 min → 90% B for 0.5 min → gradient to 99% B over 0.5 min with 1 mL/min flow. Retention times (*t<sub>R</sub>*) are given in minutes (min).

Preparative and analytical RP-HPLC was performed on a Waters e2695 system equipped with a 2998 PDA detector for product collection (at 220, 550 or 650 nm) on a Supelco Ascentis® C18 HPLC Column (preparative: 5 μm, 250 × 21.2 mm; analytical: 5 μm, 250 × 10 mm). Buffer A: 0.1% TFA in H<sub>2</sub>O Buffer B: acetonitrile. The typical gradient was from 10% B for 5 min → gradient to 90% B over 45 min → 90% B for 5 min → gradient to 99% B over 5 min with 8 mL/min flow (preparative) or 4 mL/min (analytical).

NMR spectra were recorded in deuterated solvents on BRUKER Avance III HD 400 (equipped with a CryoProbe™) and calibrated to residual solvent peaks (<sup>1</sup>H in ppm): DMSO-d<sub>6</sub> (2.50/39.52). Multiplicities are abbreviated as follows: s = singlet, d = doublet, t = triplet, q = quartet, br = broad, m = multiplet. Spectra are reported based on appearance, not on theoretical multiplicities derived from structural information.

High resolution mass spectrometry was performed using a Bruker maXis II ETD hyphenated with a Shimadzu Nexera system. The instruments were controlled *via* Brukers otofControl 4.1 and Hystar 4.1 SR2 (4.1.31.1) software. The acquisition rate was set to 3 Hz and the following source parameters were used for positive mode electrospray ionization: End plate offset = 500 V; capillary voltage = 3800 V; nebulizer gas pressure = 45 psi; dry gas flow = 10 L/min; dry temperature = 250 °C. Transfer, quadrupole and collision cell settings are mass range dependent and were fine-adjusted with consideration of the respective analyte's molecular weight. For internal calibration sodium format clusters were used. Samples were desalted *via* fast liquid chromatography. A Supelco Titan™ C18 UHPLC Column, 1.9 μm, 80 Å pore size, 20 × 2.1 mm and a 2 min gradient from 10 to 98% aqueous MeCN with 0.1% FA (H<sub>2</sub>O: Carl Roth GmbH + Co. KG ROTISOLV® Ultra LC-MS; MeCN: Merck KGaA LiChrosolv® Acetonitrile hypergrade for LC-MS; FA - Merck KGaA LiChropur® Formic acid

98%-100% for LC-MS) was used for separation. Sample dilution in 10% aqueous MeCN (hyper grade) and injection volumes were chosen dependent of the analyte's ionization efficiency. Hence, on-column loadings resulted between 0.25–5.0 ng. Automated internal re-calibration and data analysis of the recorded spectra were performed with Bruker's DataAnalysis 4.4 SR1 software.

UV/Vis spectra were recorded on a Jasco V-770 UV/Vis/NIR Spectrophotometer (PbS-version) with a PAC-743 Peltierthermo 6/8 sample switching unit and a Julabo F-250 cooling system. The spectra were recorded in PBS buffer pH 7.4 using Hellma quartz glass cuvettes (10 mm pathlength).

Fluorescence emission spectra were recorded on a Jasco FP-8600 Fluorescence Spectrometer with PAC-743 Peltierthermo 6/8 sample switching unit and a Julabo F-250 cooling system. The spectra were recorded in PBS buffer pH 7.4 using Hellma dark quartz glass fluorescence cuvettes (10 mm pathlength).

The quantum yields were determined using a Hamamatsu C11347 Absolute PL Quantum Yield Spectrometer (Quantaaurus-QY) in PBS pH 7.4.

#### **General protocol to generate NHS esters**

A 1 mL vial was charged with 1.0 equiv. of acid dissolved in DMF and 4.0 equiv. of DIPEA was added before 1.1 equiv. of TSTU in one portion (for amounts <1 mg of TSTU, stock solutions were prepared as it is critical to not overload TSTU). The active NHS ester was allowed to form for 15 min and used without further purification.

#### **General protocol for peptide coupling using NHS esters**

A 1 mL vial was charged with 1.1 equiv. amine dissolved in DMF and 4.0 equiv. DIPEA. The pre-formed NHS ester (section 1.3) was added drop-wise at and the reaction mixture was allowed to stir at r.t. Upon complete conversion according to LCMS (usually <30 min), the reaction was quenched by addition of 5 vol% HOAc and 10 vol% water and subjected to RP-HPLC. The desired products were obtained as colored powders.

## TMR-Mal

TMR-6-COOH: 20.0 mg (46.5  $\mu\text{mol}$ ); *N*-(2-Aminoethyl)maleimide trifluoroacetate salt (Aldrich #56951): 13.0 mg (51.1  $\mu\text{mol}$ ); 3 mL DMF.

Yield: 11.0 mg; 43%.

Red powder.

**$^1\text{H}$  NMR** (400 MHz, DMSO- $d_6$ ):  $\delta$  [ppm] = 8.78 (t,  $J$  = 6.0 Hz, 1H), 8.08–8.02 (m, 2H), 7.51 (d,  $J$  = 1.3 Hz, 1H), 6.95 (s, 2H), 6.51 (d,  $J$  = 1.4 Hz, 6H), 3.52 (t,  $J$  = 5.8 Hz, 2H), 3.33 (2H), 2.94 (s, 12H). The signal at 3.33 ppm is colocalized with the water signal at 3.31 ppm, but was detected by COSY and HSQC.

**$^{13}\text{C}$  NMR** (100 MHz, DMSO- $d_6$ ):  $\delta$  [ppm] = 171.0, 168.2, 165.0, 152.8, 152.1, 152.0, 140.5, 134.5, 129.0, 128.6, 128.5, 124.8, 122.3, 109.1, 105.6, 98.0, 84.7, 37.8, 36.9.

**UV/Vis** (LCMS):  $\lambda_{\text{max}}$  = 556 nm.

$t_R$  (LCMS) = 2.502 min.

**HRMS** (ESI): calc. for  $\text{C}_{31}\text{H}_{29}\text{N}_4\text{O}_6$   $[\text{M}+\text{H}]^+$ : 553.2082, found: 553.2083.

## Cy5-Mal

Cy5-COOH: 100.0 mg (210  $\mu\text{mol}$ ); *N*-(2-Aminoethyl)maleimide trifluoroacetate salt (Aldrich #56951): 59.1 mg (232  $\mu\text{mol}$ ); 6 mL DMF.

Yield: 35.2 mg; 23%.

Blue powder as its TFA salt.

**$^1\text{H}$  NMR** (400 MHz, MeOD- $d_4$ ):  $\delta$  [ppm] = 8.32 (t,  $J$  = 13.1 Hz, 2H), 7.89 (t,  $J$  = 6.1 Hz, 1H), 7.61 (d,  $J$  = 7.4 Hz, 2H), 7.49–7.35 (m, 4H), 7.35–7.13 (m, 2H), 6.99 (s, 2H), 6.56 (t,  $J$  = 12.3 Hz, 1H), 6.46–6.16 (m, 2H), 4.07 (t,  $J$  = 7.4 Hz, 2H), 3.60 (s, 3H), 3.42 (t,  $J$  = 5.8 Hz, 2H), 3.28–3.07 (m, 2H), 1.97 (t,  $J$  = 7.2 Hz, 2H), 1.80–1.57 (m, 14H), 1.61–1.43 (m, 2H), 1.40–1.11 (m, 2H).

**$^{13}\text{C}$  NMR** (100 MHz, DMSO- $d_6$ ):  $\delta$  [ppm] = 173.2, 172.5, 172.1, 171.0, 158.1 (q,  $J$  = 35.3 Hz), 154.0 (2x), 142.8, 142.0, 141.1, 141.0, 134.5, 128.4, 128.4, 125.3, 124.7, 124.6, 122.4, 122.3, 116.0 (q,  $J$  = 293.6 Hz), 111.0 (2x), 103.3, 103.0, 48.9 (2x), 43.3, 37.3, 36.7, 35.0, 31.1, 27.2, 27.0, 26.7, 25.7, 24.7.

**UV/Vis** (LCMS):  $\lambda_{\text{max}}$  = 640 nm.

$t_R$  (LCMS) = 2.971 min.

**HRMS** (ESI): calc. for  $\text{C}_{38}\text{H}_{45}\text{N}_4\text{O}_3$   $[\text{M}]^+$ : 605.3486, found: 605.3488.

## SiR-Mal

SiR-6-COOH: 30.0 mg (63.4  $\mu\text{mol}$ ); *N*-(2-Aminoethyl)maleimide trifluoroacetate salt (Aldrich #56951): 17.7 mg (69.6  $\mu\text{mol}$ ); 4 mL DMF.

Yield: 22.8 mg; 60%.

Blue powder.

**$^1\text{H}$  NMR** (400 MHz,  $\text{DMSO-}d_6$ ):  $\delta$  [ppm] = 8.82 (t,  $J$  = 6.0 Hz, 1H), 8.02 (d,  $J$  = 8.0 Hz, 1H), 7.94 (dd,  $J$  = 8.0, 1.4 Hz, 1H), 7.62–7.57 (m, 1H), 7.02 (t,  $J$  = 2.7 Hz, 2H), 6.96 (s, 2H), 6.72–6.55 (m, 4H), 3.54 (dd,  $J$  = 6.5, 5.0 Hz, 2H), 2.92 (d,  $J$  = 1.4 Hz, 12H), 0.64 (s, 3H), 0.53 (s, 3H). The signal at 3.33 ppm is colocalized with the water signal at 3.31 ppm, but was detected by COSY.

**$^{13}\text{C}$  NMR** (100 MHz,  $\text{DMSO-}d_6$ ):  $\delta$  [ppm] = 171.0, 169.3, 165.3, 154.7, 149.3, 139.9, 135.9, 135.3, 134.5, 130.4, 128.0, 127.5, 127.4, 125.4, 122.7, 116.4, 113.7, 91.3, 37.8, 36.9, 0.1, -1.2.

**UV/Vis** (LCMS):  $\lambda_{\text{max}}$  = 656 nm.

$t_R$  (LCMS) = 2.514 min.

**HRMS** (ESI): calc. for  $\text{C}_{33}\text{H}_{35}\text{N}_4\text{O}_5\text{Si}$   $[\text{M}+\text{H}]^+$ : 595.2371, found: 595.2374.

## Synthesis of S39C-Ex4(9-39)

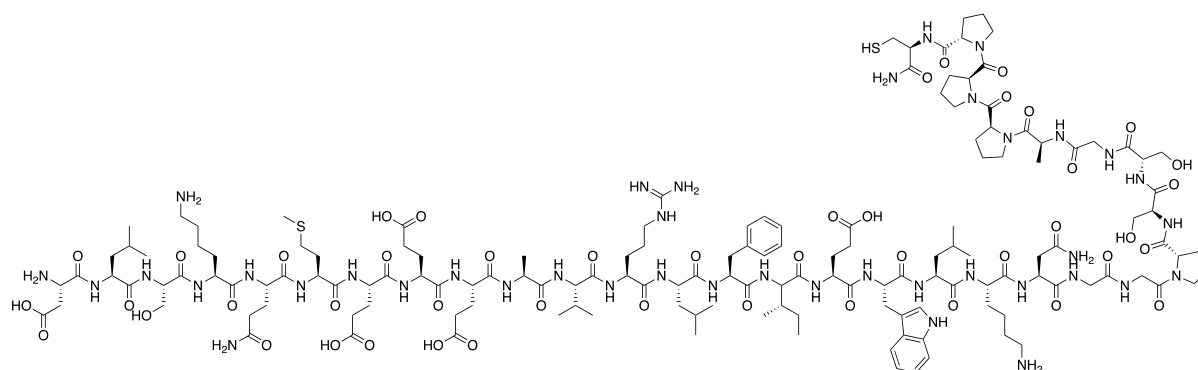

**S39C-Ex4(9-39)**

H-Asp-Leu-Ser-Lys-Gln-Met-Glu-Glu-Glu-Ala-Val-Arg-Leu-Phe-Ile-Glu-Trp-Leu-Lys-Asn-Gly-Gly-Pro-Ser-Ser-Gly-Ala-Pro-Pro-Pro-Cys-NH<sub>2</sub>

Chemical Formula: C<sub>149</sub>H<sub>234</sub>N<sub>40</sub>O<sub>46</sub>S<sub>2</sub>  
Exact Mass: 3383,6642  
Molecular Weight: 3385,8650

Peptides were synthesized on a CEM Liberty Blue Peptide Synthesizer with a CEM Discovery Microwave using standard Fmoc-protected solid phase peptide synthesis protocols with standard reagents. Pre-loaded Fmoc-Cys(Trt)-Tentagel S PHB resin (Rapp Polymere, Germany) containing 0.2-0.3 mmol/g amino acid was used as solid-phase. Peptide synthesis scale was 0.1 mmol using the standard coupling reagents DIC/Oxyma 0.5/1.0 M in DMF and DIPEA 2 M in DMF. Fmoc-protected amino acids (Sigma-Aldrich and NovaBiochem Merck, Germany) with standard residual protecting groups were coupled using a five-fold excess (2 M solutions). Deprotection of the Fmoc-protecting group was achieved by treatment with 20% piperidine in DMF. After completion of all coupling steps, the resin-bound peptide was transferred into a syringe with frit followed by global deprotection using 10 mL of a TFA:H<sub>2</sub>O:tri-*iso*-propylsilane (95:2.5:2.5) mixture within 2 h under argon atmosphere. The peptide solution was filtered and the filtrate was concentrated under reduced pressure and residual TFA was removed by co-evaporation with toluene (3x). The residue was dissolved in a small amount of methanol and precipitated in 40 mL chilled diethyl ether and stored overnight at -38 °C to complete precipitation. The suspension was subjected to centrifugation (1843 x g, 4 °C, 5 min), the supernatant removed and the residue dried before being reconstituted in water and subjected to RP-HPLC purification. The combined purified fractions were lyophilized and the **S39C-Ex4(9-39)** peptide was yielded as white TFA salt.

Yield: 50 mg; ~15%.

**UV/Vis** (LCMS):  $\lambda_{\text{max}}$  = 212 nm.

**t<sub>R</sub>** (HPLC) = 24.4 min.

**HRMS** (ESI): calc. for C<sub>149</sub>H<sub>238</sub>N<sub>40</sub>O<sub>46</sub>S<sub>2</sub> [M+4H]<sup>4+</sup>: 847.1742, found: 847.1741.

## Synthesis of LUXendin555

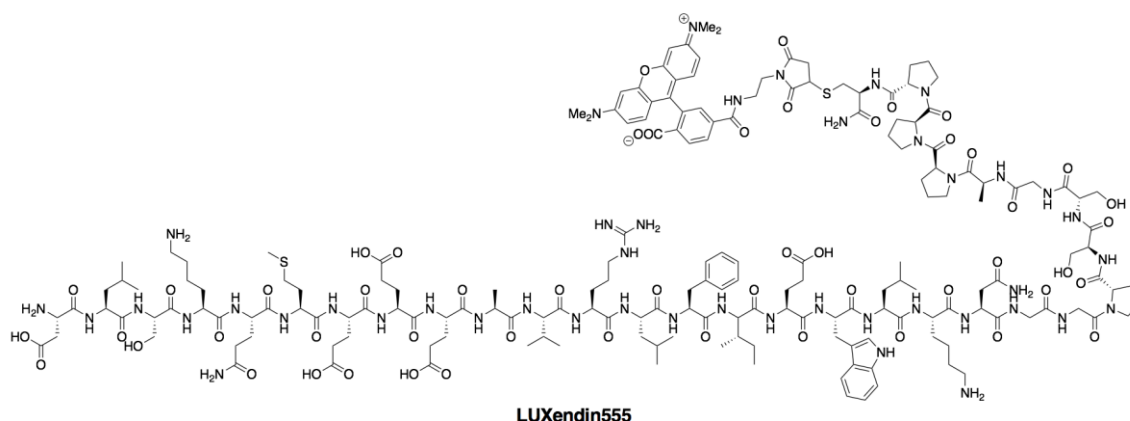

**LUXendin555**

H-Asp-Leu-Ser-Lys-Gln-Met-Glu-Glu-Glu-Ala-Val-Arg-Leu-Phe-Ile-Glu-Trp-Leu-Lys-Asn-Gly-Gly-Pro-Ser-Ser-Gly-Ala-Pro-Pro-Pro-Cys(TMR)-NH<sub>2</sub>

Chemical Formula: C<sub>180</sub>H<sub>262</sub>N<sub>44</sub>O<sub>52</sub>S<sub>2</sub>

Exact Mass: 3935,8651

Molecular Weight: 3938,4520

To a solution of S39C-Ex4(9-39) (2.03 mg, 600 nmol, 1.0 eq.) in PBS (400 μL) was added TMR-Mal (0.5 mg, 877 nmol, 1.5 eq.). The solution was stirred at room temperature over night before being subjected to RP-HPLC purification (water/ACN gradient, 90/10 → 10/90 in 60 min). The purified fractions were combined and lyophilized from the HPLC solvent to yield **LUXendin555** as light blue TFA salt. The concentration was determined *via* the absorption of the TMR fluorophore at 550 nm ( $\epsilon = 84,000 \text{ mol L}^{-1} \text{ cm}^{-1}$  in PBS with 0.1% SDS) and stocks of 10 nmol each were prepared and stored at -80 °C.

Yield: 350 nmol; 58%.

**UV/Vis** (UV, FluoSpec):  $E_{\text{max}} = 555 \text{ nm}$ ,  $E_{\text{max}} = 579 \text{ nm}$ .

$t_R$  (HPLC) = 25.0 min.

**HRMS** (ESI): calc. for C<sub>180</sub>H<sub>266</sub>N<sub>44</sub>O<sub>52</sub>S<sub>2</sub> [M+4H]<sup>4+</sup>: 985.4764, found: 985.4749.



## Synthesis of LUXendin645

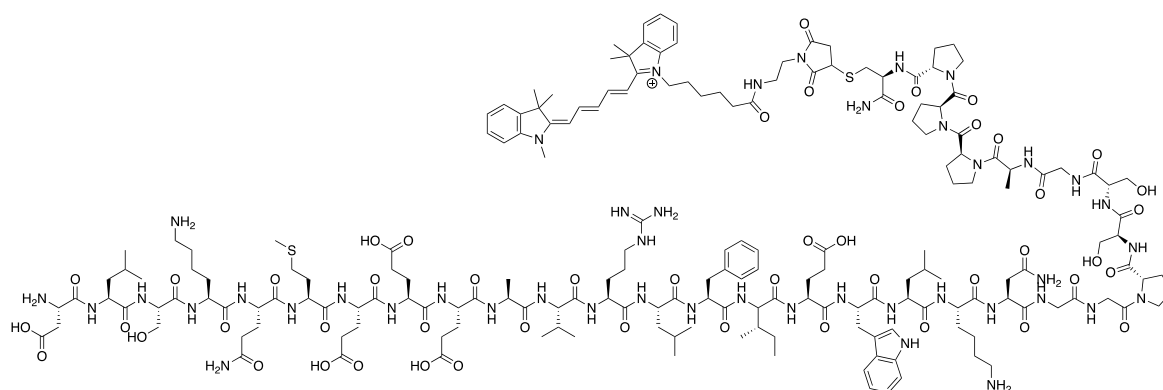

**LUXendin645**

H-Asp-Leu-Ser-Lys-Gln-Met-Glu-Glu-Glu-Ala-Val-Arg-Leu-Phe-Ile-Glu-Trp-Leu-Lys-Asn-Gly-Gly-Pro-Ser-Ser-Gly-Ala-Pro-Pro-Pro-Cys(Cy5)-NH<sub>2</sub>

Chemical Formula: C<sub>187</sub>H<sub>279</sub>N<sub>44</sub>O<sub>49</sub>S<sub>2</sub><sup>+</sup>

Exact Mass: 3989,0128

Molecular Weight: 3991,6675

To a solution of S39C-Ex4(9-39) (2.03 mg, 600 nmol, 1.0 eq.) in PBS (400  $\mu$ L) was added Cy5-Mal (0.5 mg, 824 nmol, 1.4 eq.). The solution was stirred at room temperature over night before being subjected to RP-HPLC purification (water/ACN gradient, 90/10  $\rightarrow$  10/90 in 60 min). The purified fractions were combined and lyophilized from the HPLC solvent to yield **LUXendin645** as light blue TFA salt. The concentration was determined *via* the absorption of the Cy5 fluorophore at 647 nm ( $\epsilon = 250,000 \text{ mol L}^{-1} \text{ cm}^{-1}$  in PBS with 0.1% SDS) and stocks of 10 nmol each were prepared and stored at -80  $^{\circ}$ C.

Yield: 400 nmol; 67%.

**UV/Vis** (UV, FluoSpec):  $E_{\text{max}} = 645 \text{ nm}$ ,  $E_{\text{max}} = 664 \text{ nm}$ .

$t_R$  (HPLC) = 26.3 min.

**HRMS** (ESI): calc. for C<sub>187</sub>H<sub>279</sub>N<sub>44</sub>O<sub>49</sub>S<sub>2</sub> [M+4H]<sup>5+</sup>: 799.0097, found: 799.0095.

## Synthesis of LUXendin651

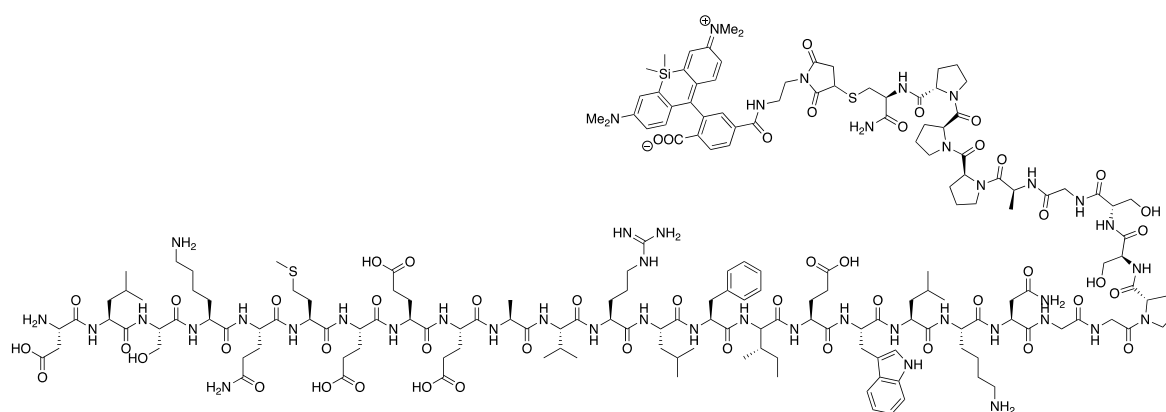

**LUXendin651**

H-Asp-Leu-Ser-Lys-Gln-Met-Glu-Glu-Glu-Ala-Val-Arg-Leu-Phe-Ile-Glu-Trp-Leu-Lys-Asn-Gly-Gly-Pro-Ser-Ser-Gly-Ala-Pro-Pro-Pro-Cys(SiR)-NH<sub>2</sub>

Chemical Formula: C<sub>182</sub>H<sub>268</sub>N<sub>44</sub>O<sub>51</sub>S<sub>2</sub>Si

Exact Mass: 3977.8941

Molecular Weight: 3980.6080

To a solution of S39C-Ex4(9-39) (2.03 mg, 600 nmol, 1.0 eq.) in PBS (400  $\mu$ L) was added SiR-Mal (0.5 mg, 833 nmol, 1.4 eq.). The solution was stirred at room temperature over night before being subjected to RP-HPLC purification (water/ACN gradient, 90/10  $\rightarrow$  10/90 in 60 min). The purified fractions were combined and lyophilized from the HPLC solvent to yield **LUXendin651** as light blue TFA salt. The concentration was determined *via* the absorption of the SiR fluorophore at 647 nm ( $\epsilon = 100,000 \text{ mol L}^{-1} \text{ cm}^{-1}$  in PBS with 0.1% SDS) and stocks of 10 nmol each were prepared and stored at -80  $^{\circ}$ C.

Yield: 400 nmol; 67%.

**UV/Vis** (UV, FluoSpec):  $E_{x_{\max}}$  = 651 nm,  $E_{m_{\max}}$  = 669 nm.

$t_R$  (HPLC) = 24.8 min.

**HRMS** (ESI): calc. for C<sub>182</sub>H<sub>269</sub>N<sub>44</sub>O<sub>51</sub>S<sub>2</sub>Si [M+4H]<sup>4+</sup>: 995.9836, found: 995.9821.

## SUPPLEMENTARY FIGURES

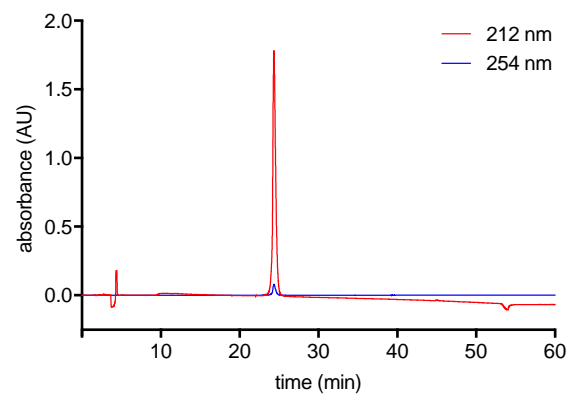

**Supplementary Figure 1: Analytical RP-HPLC trace of S39C-Ex4(9-39) peptide**

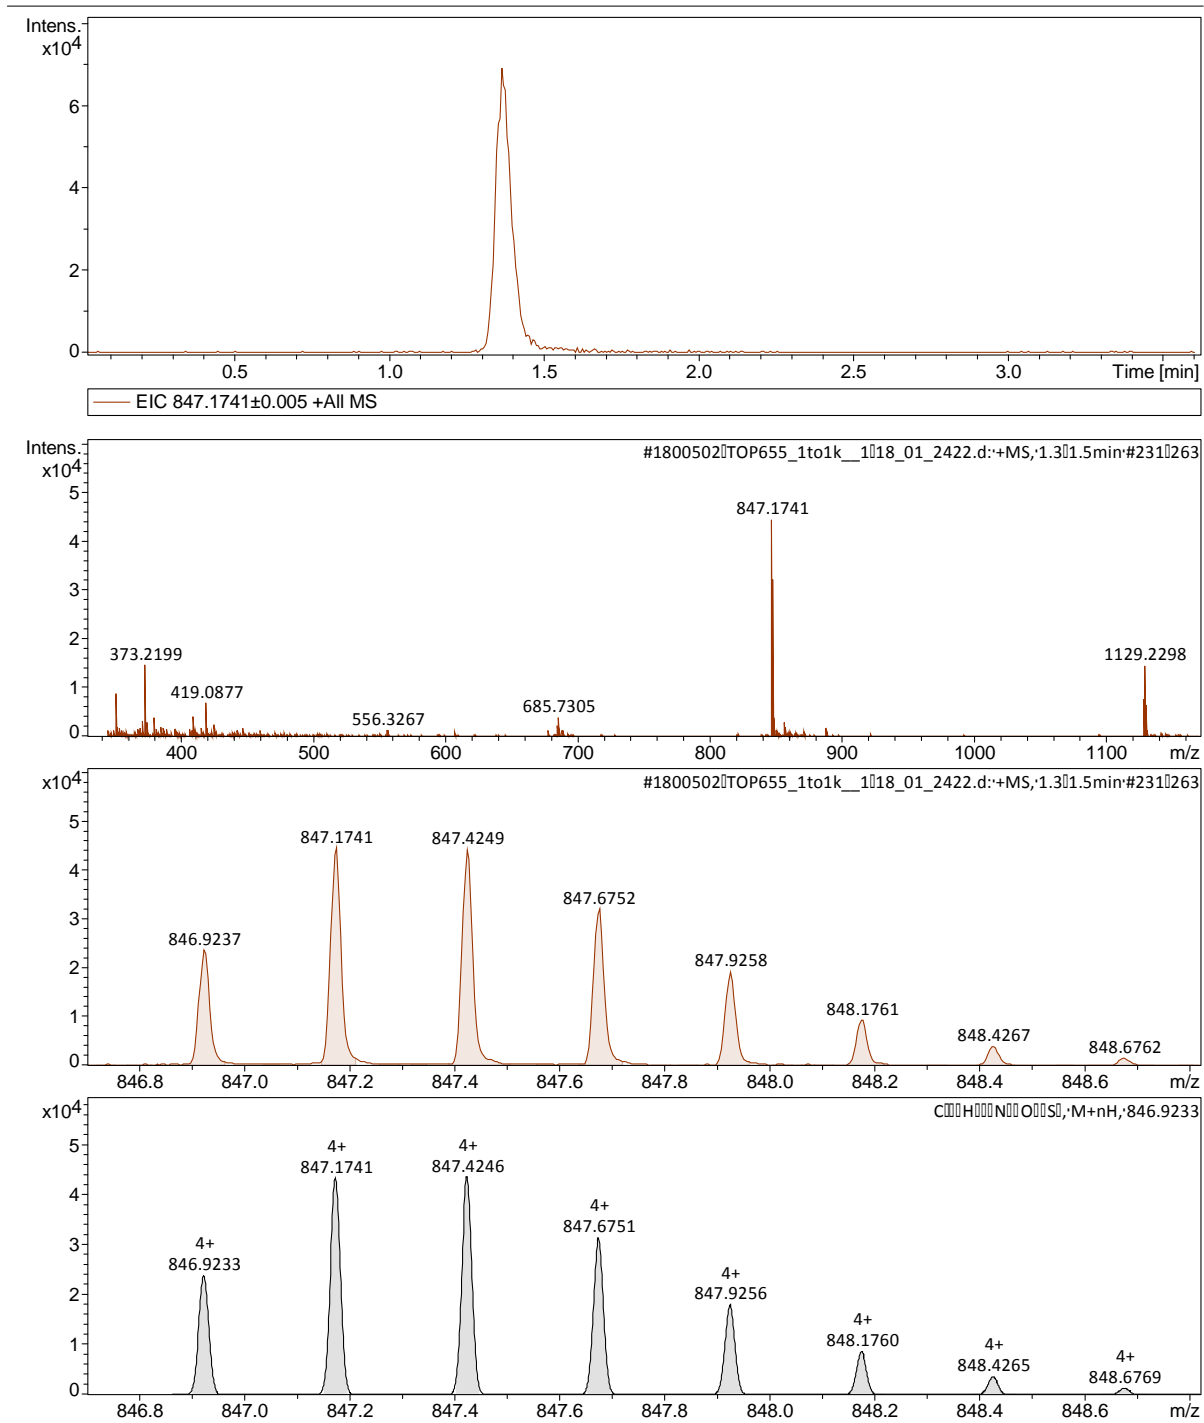

Supplementary Figure 2: HR ESI-MS spectrum of S39C-Ex4(9-39).

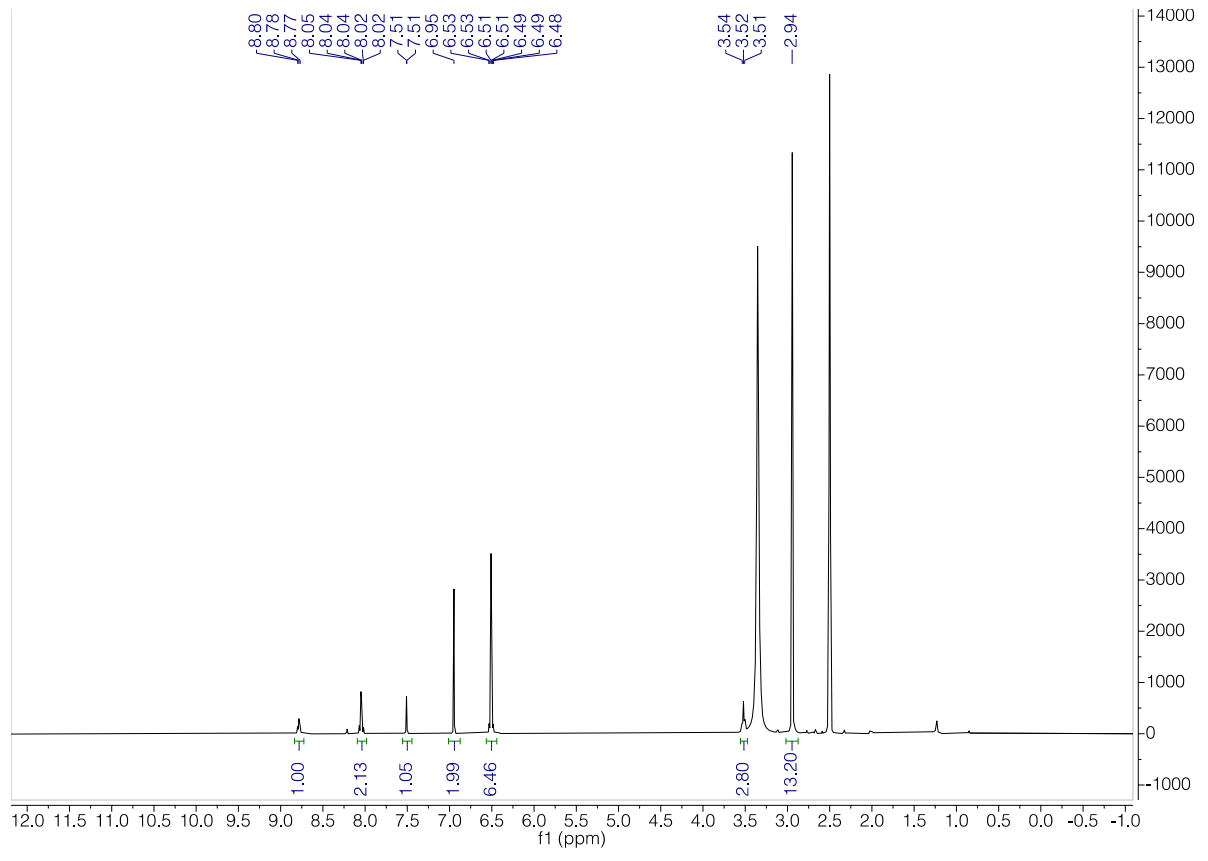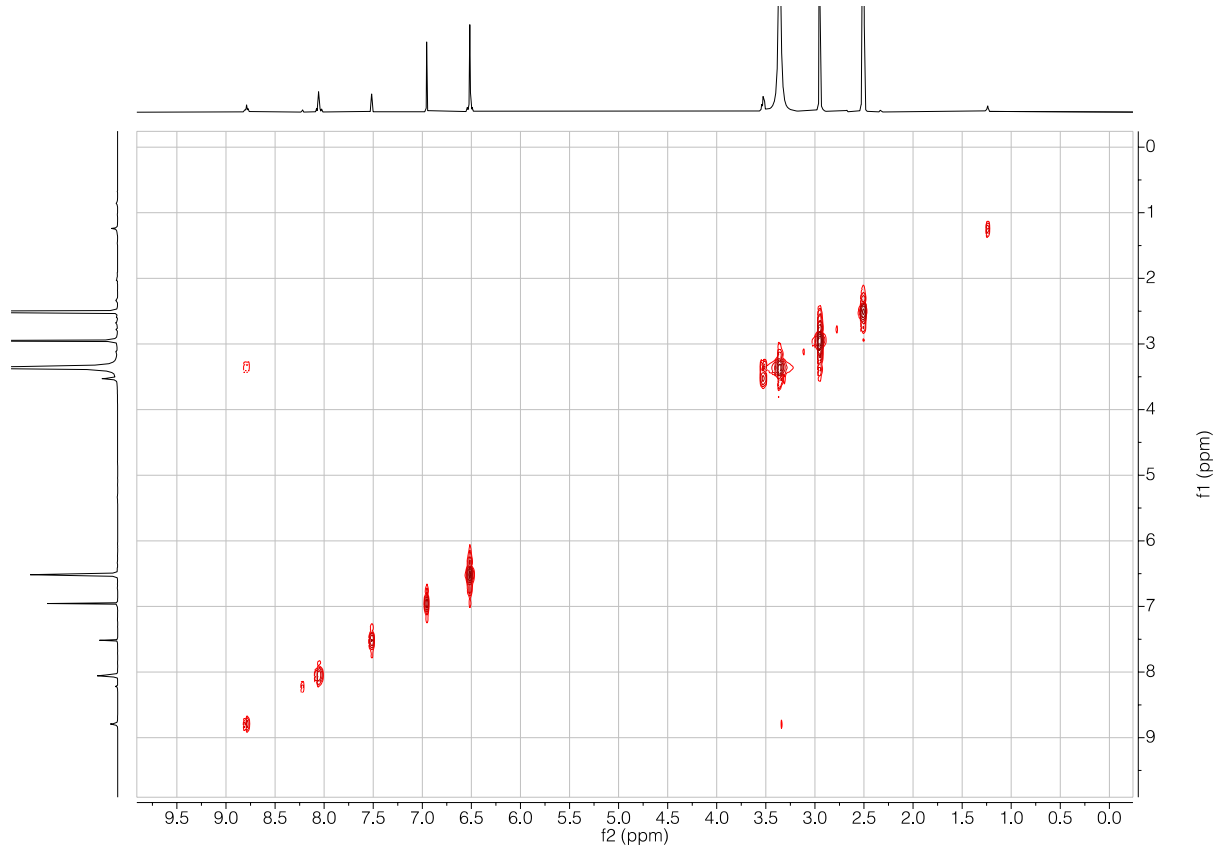

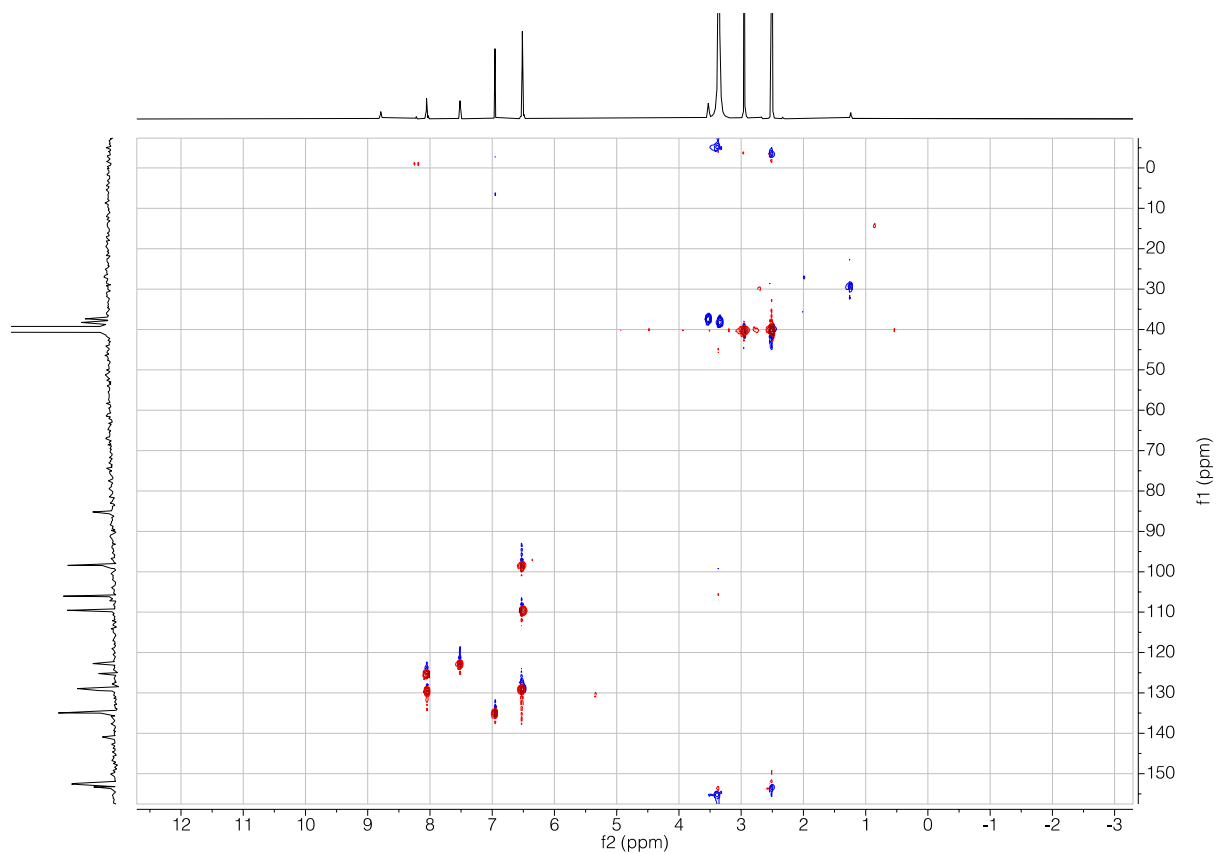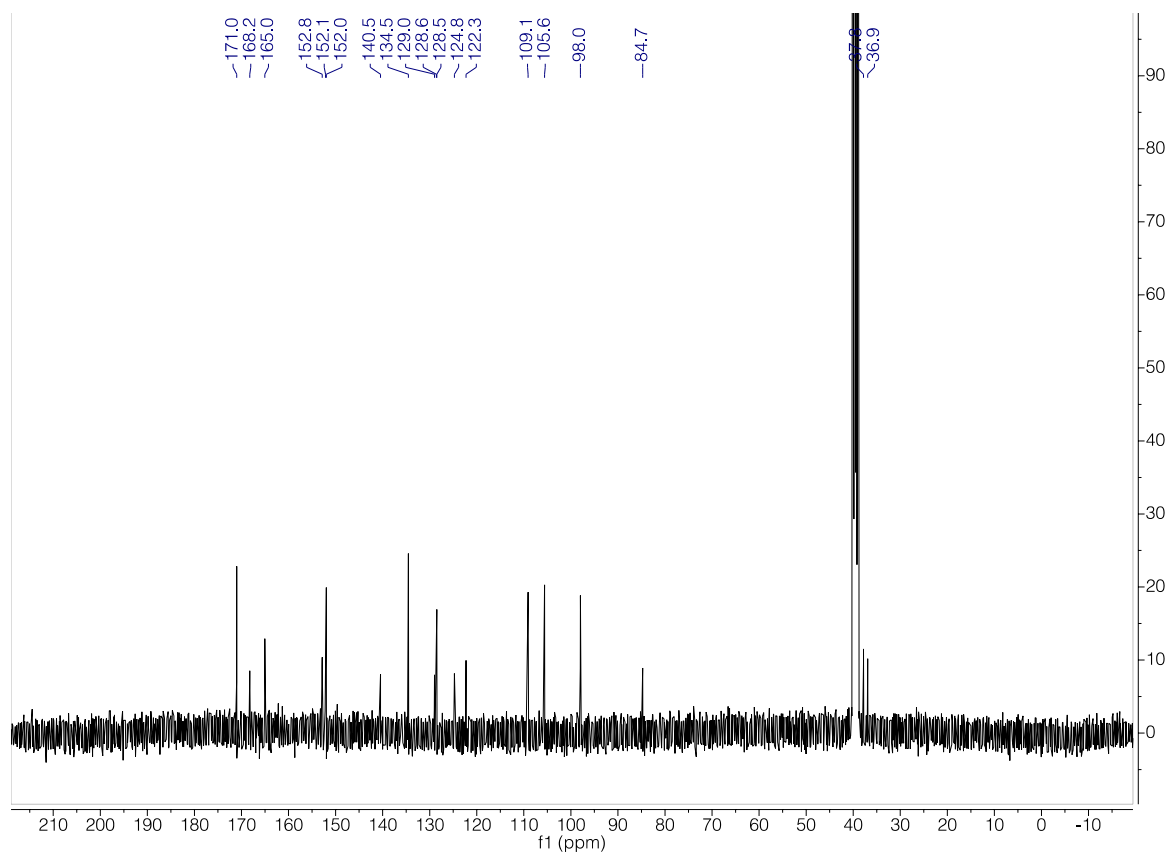

Supplementary Figure 3: NMR spectroscopy of TMR-Mal:  $^1\text{H}$ , COSY, HSQC and  $^{13}\text{C}$ .

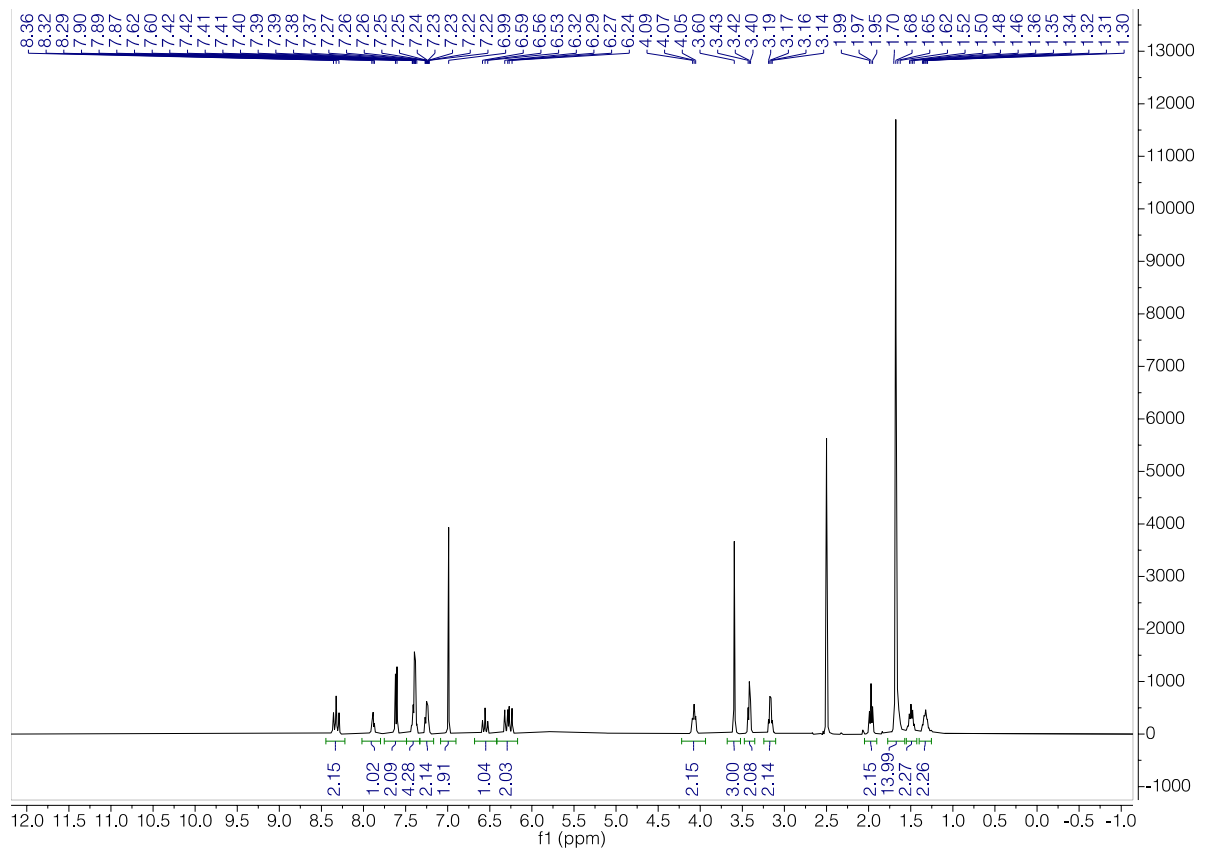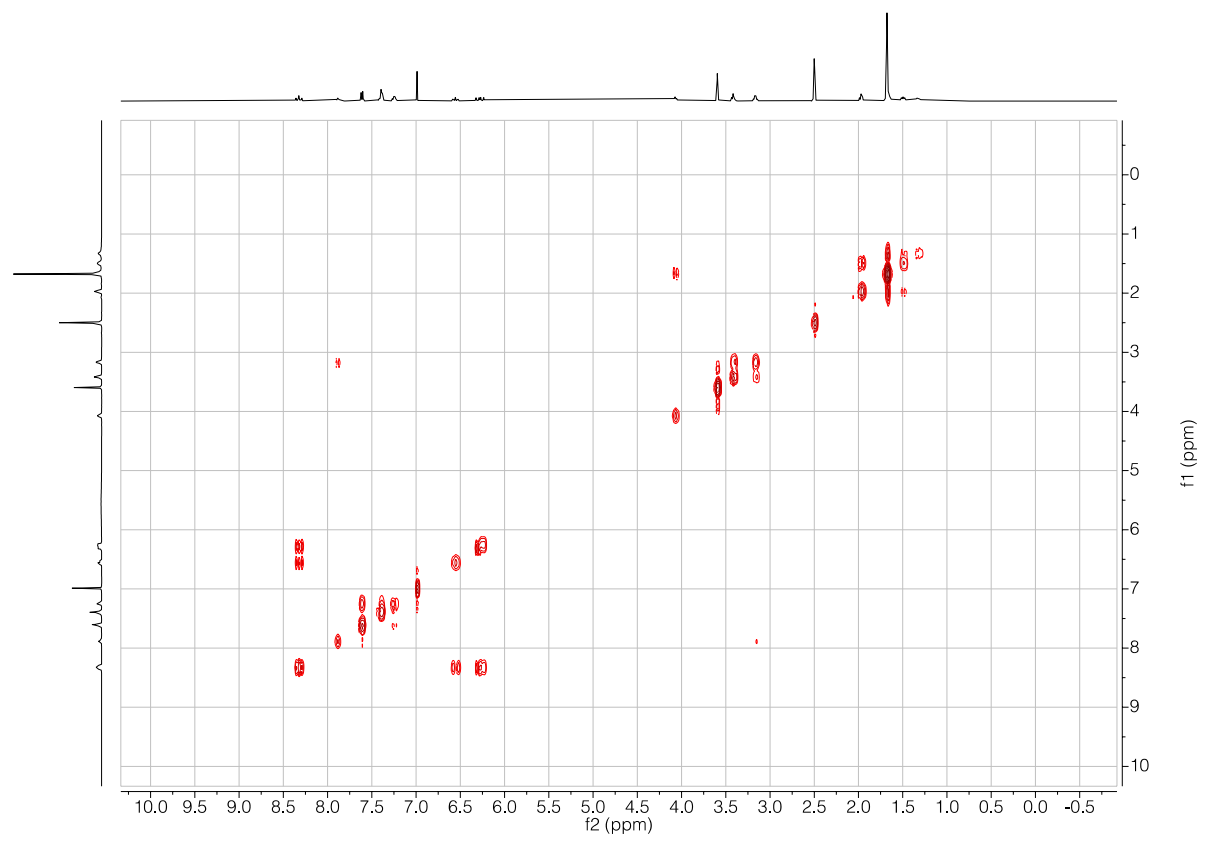

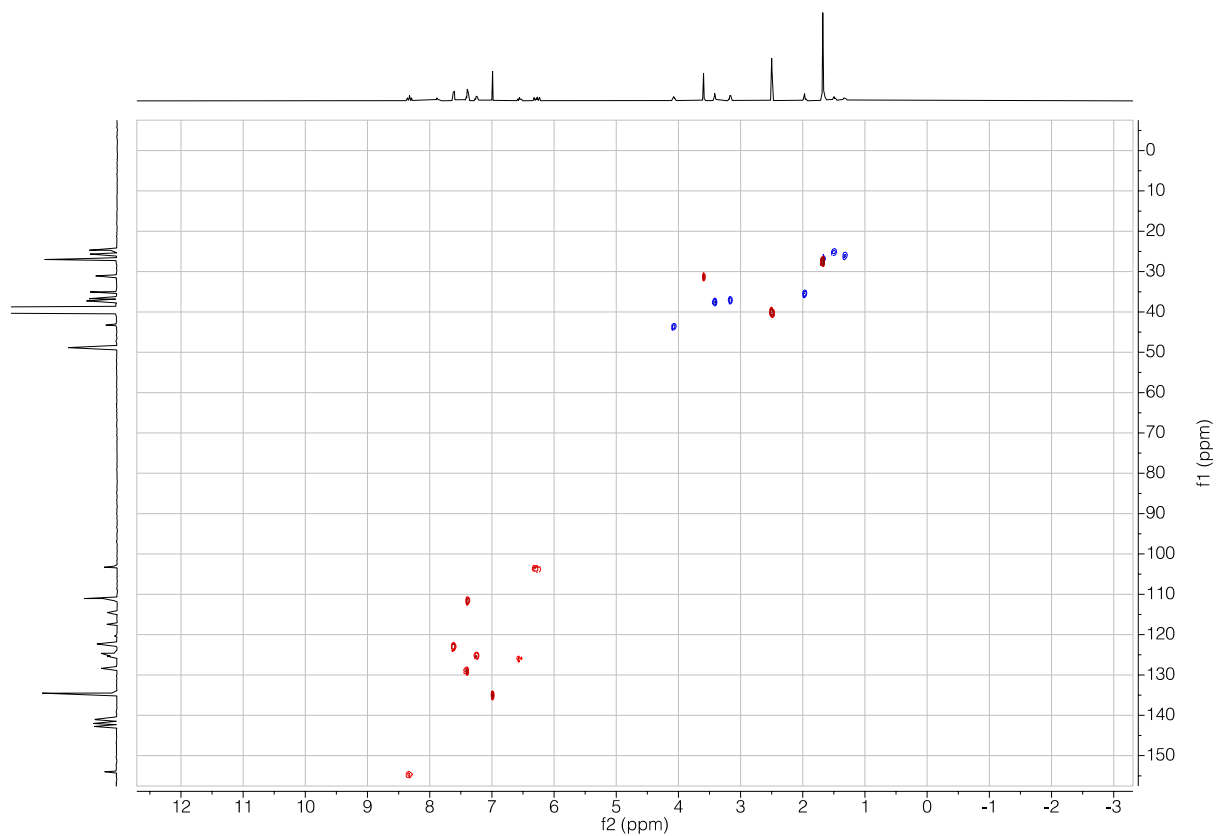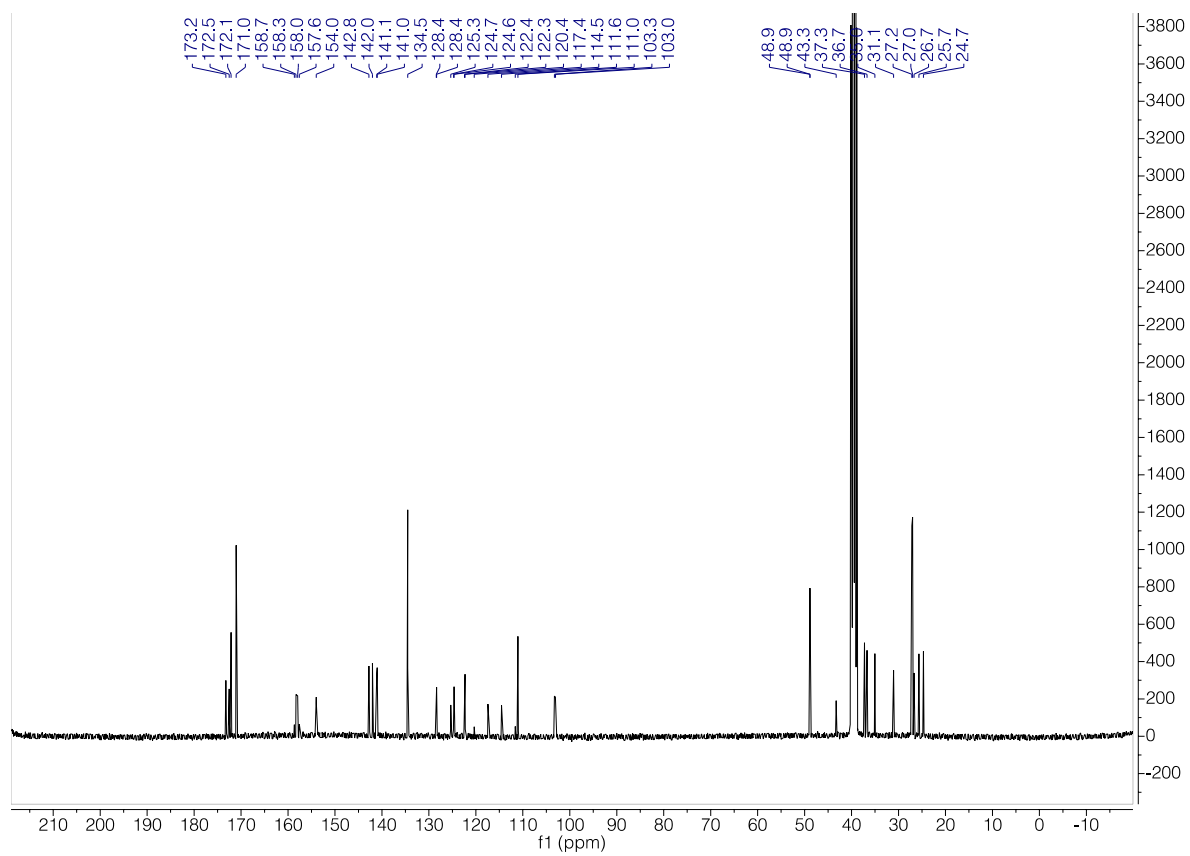

Supplementary Figure 4: NMR spectroscopy of Cy5-Mal:  $^1\text{H}$ , COSY, HSQC and  $^{13}\text{C}$ .



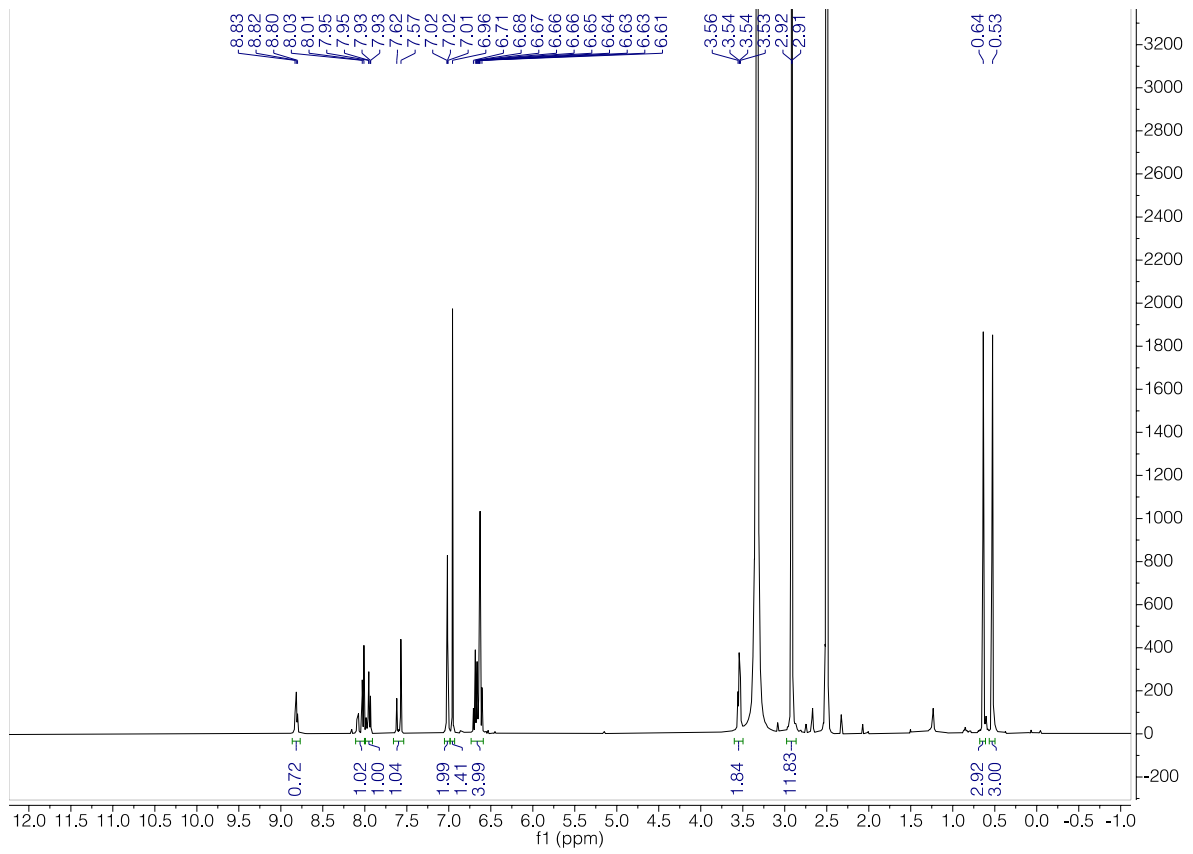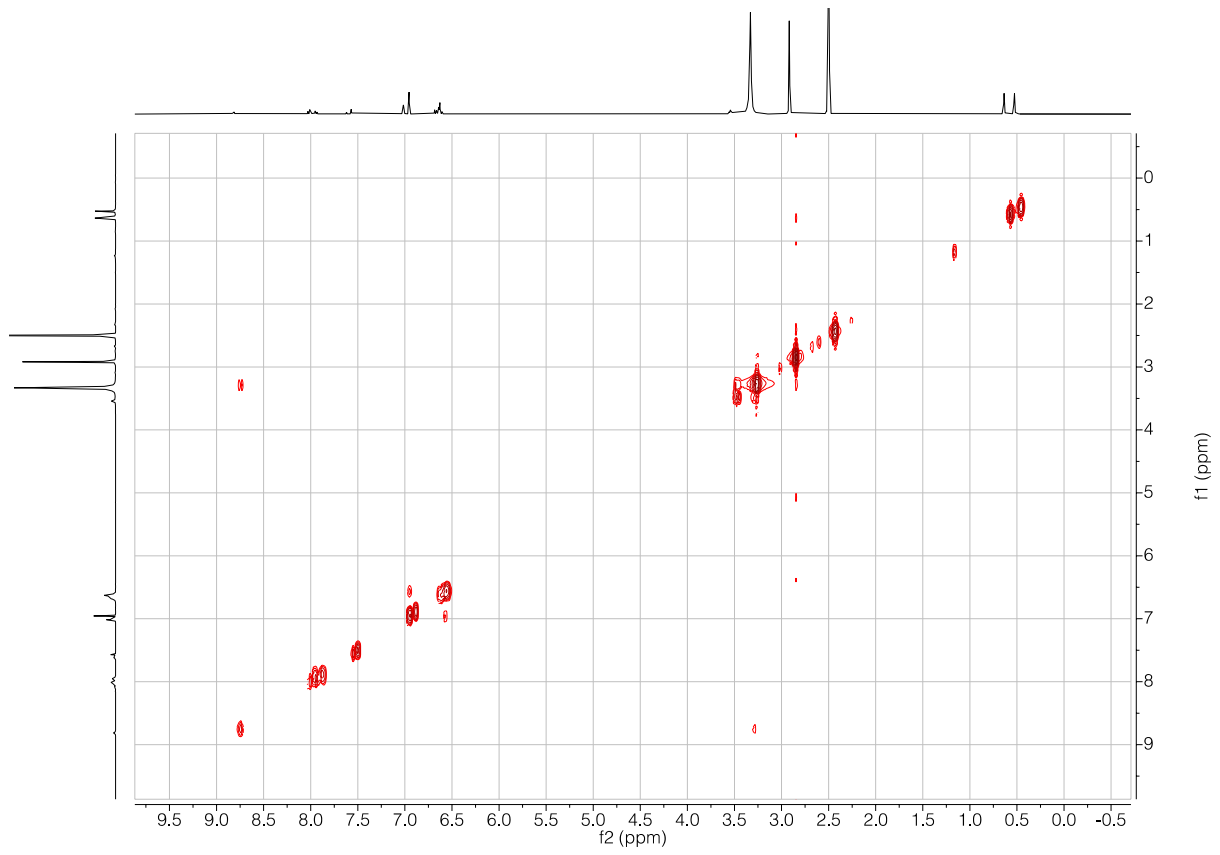

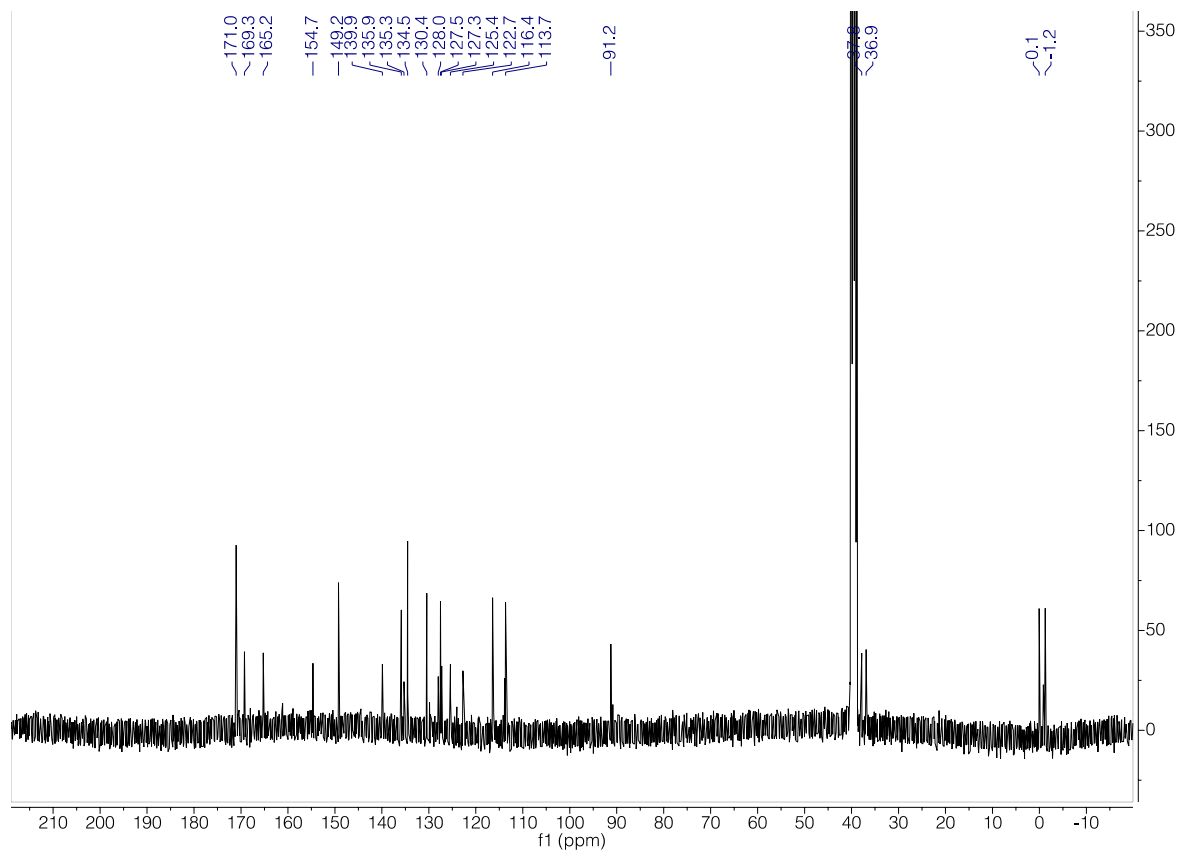

**Supplementary Figure 5: NMR spectroscopy of SiR-Mal:  $^1\text{H}$ , COSY and  $^{13}\text{C}$ .**

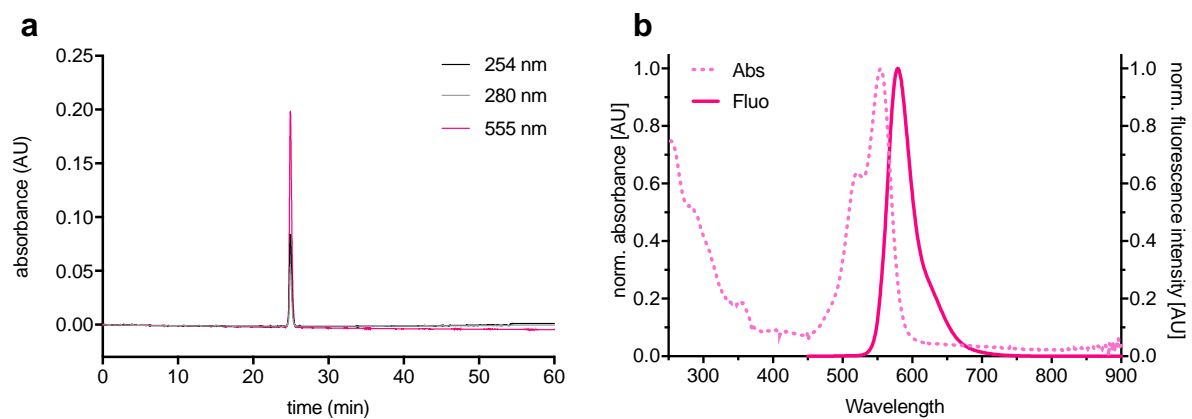

**Supplementary Figure 6: LUXendin555 HPLC and absorbance/emission spectra. a** Analytical RP-HPLC trace of **LUXendin555**. **b** Normalized absorption and fluorescence emission spectra of **LUXendin555**.

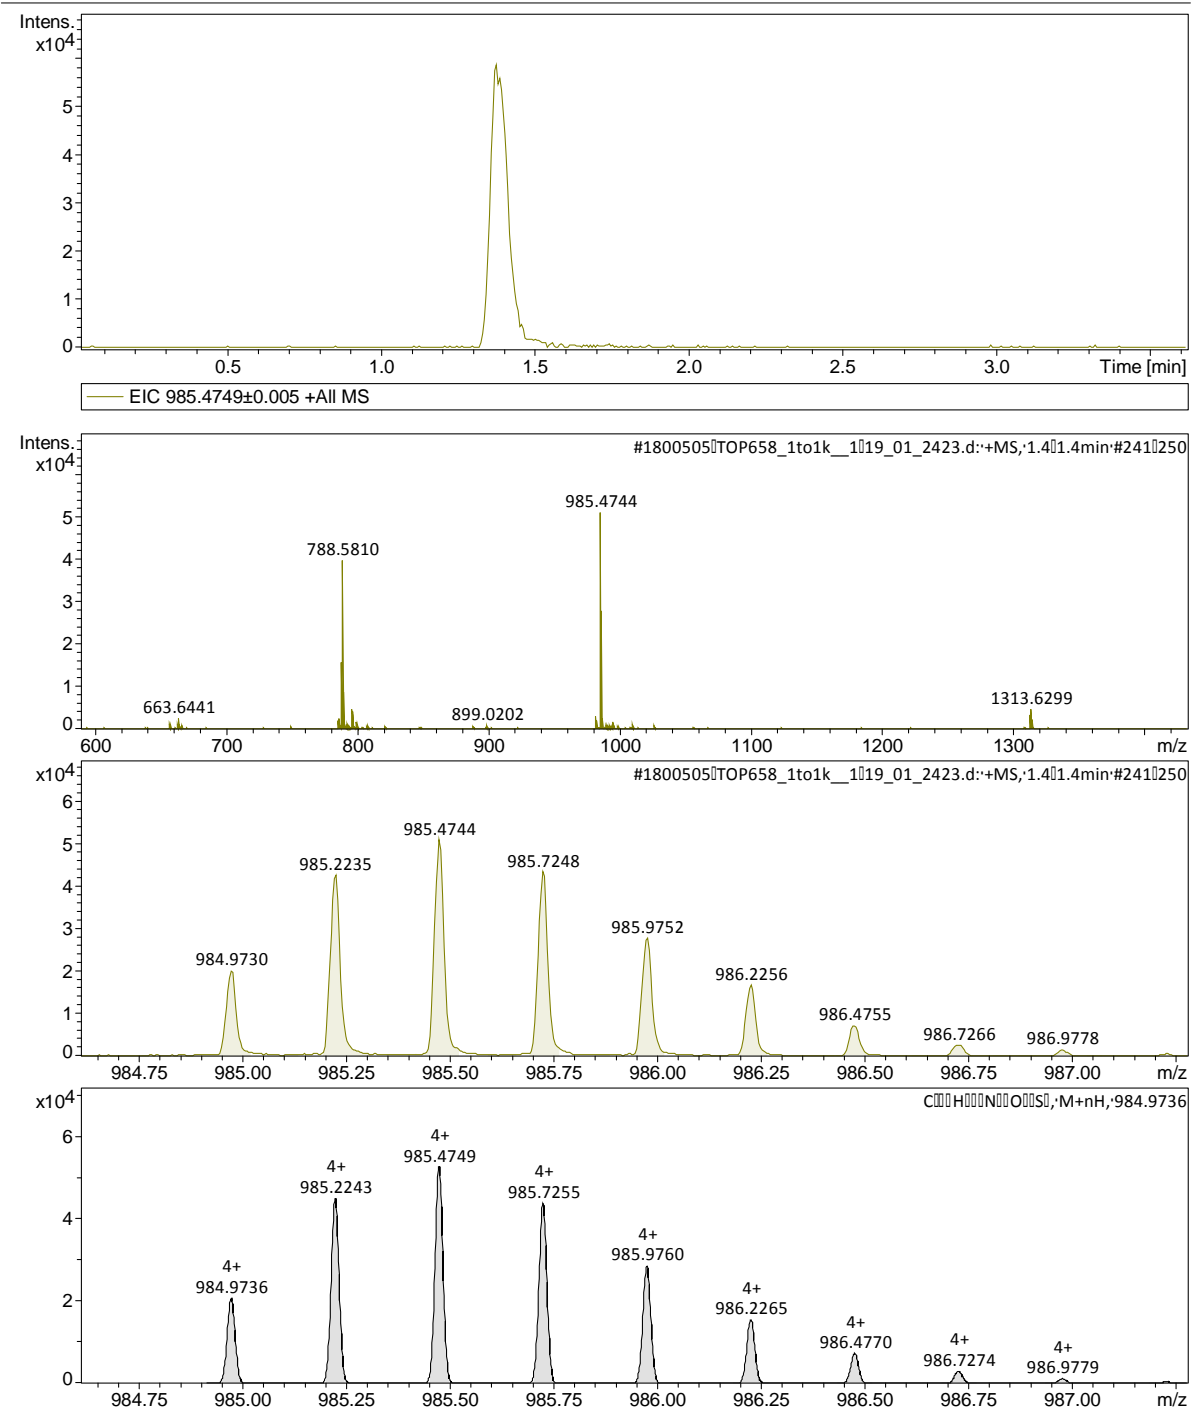

**Supplementary Figure 7: HR ESI-MS of LUXendin555.**

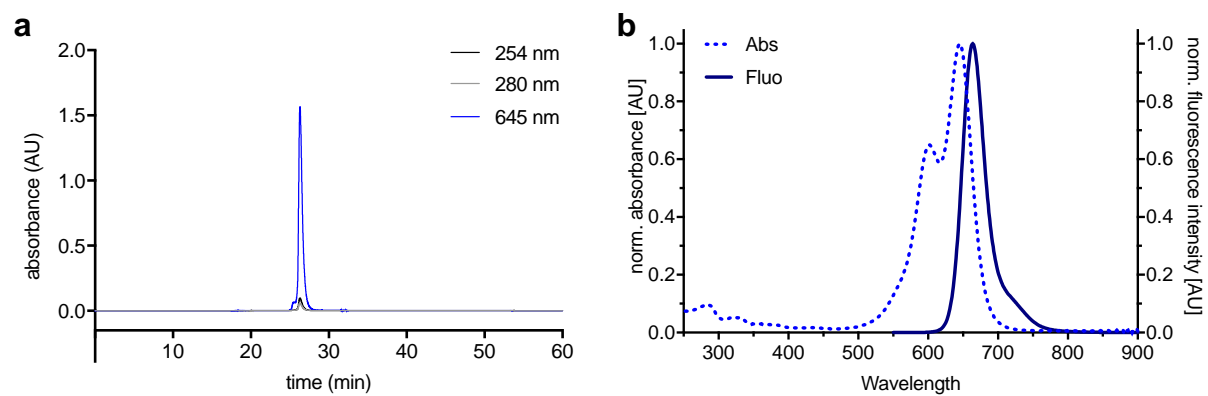

**Supplementary Figure 8: LUXendin645 HPLC and absorbance/emission spectra. a** Analytical RP-HPLC trace of **LUXendin645**. **b** Normalized absorption and fluorescence emission spectra of **LUXendin645**.

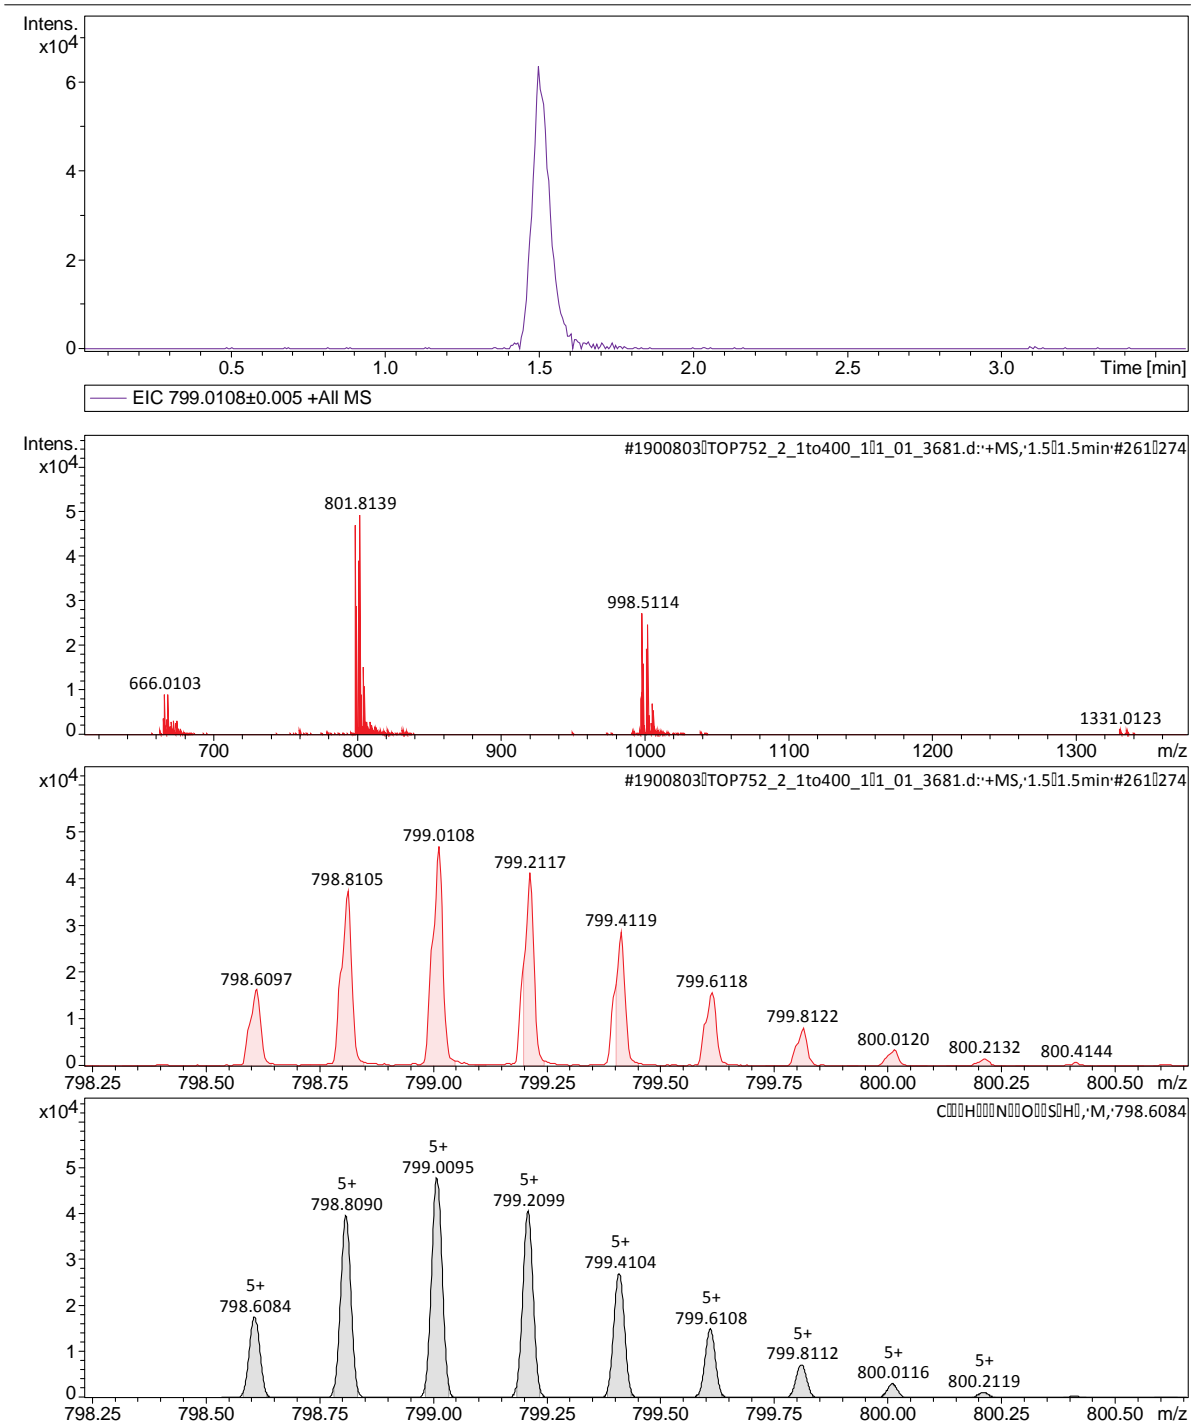

**Supplementary Figure 9: HR ESI-MS of LUXendin645.**

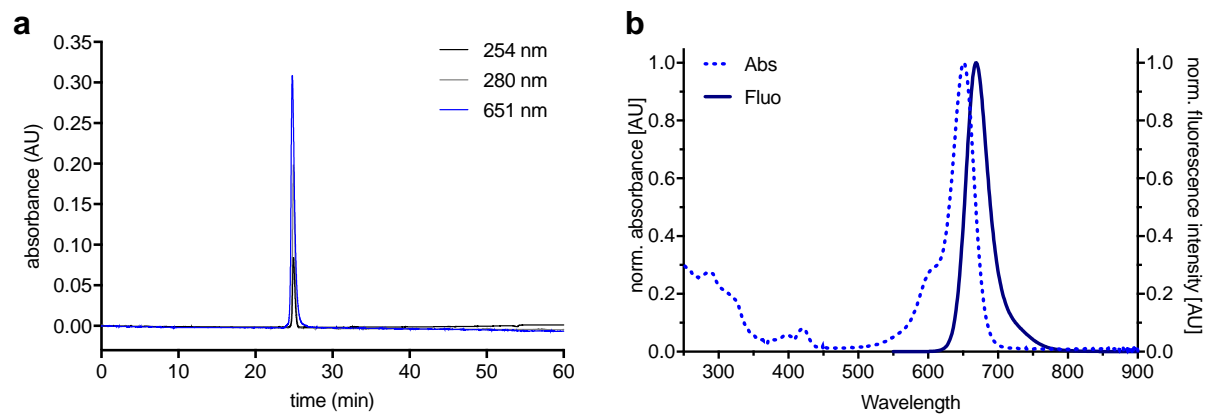

**Supplementary Figure 10: LUXendin651 HPLC and absorbance/emission spectra. a** Analytical RP-HPLC trace of **LUXendin651**. **b** Normalized absorption and fluorescence emission spectra of **LUXendin651**.

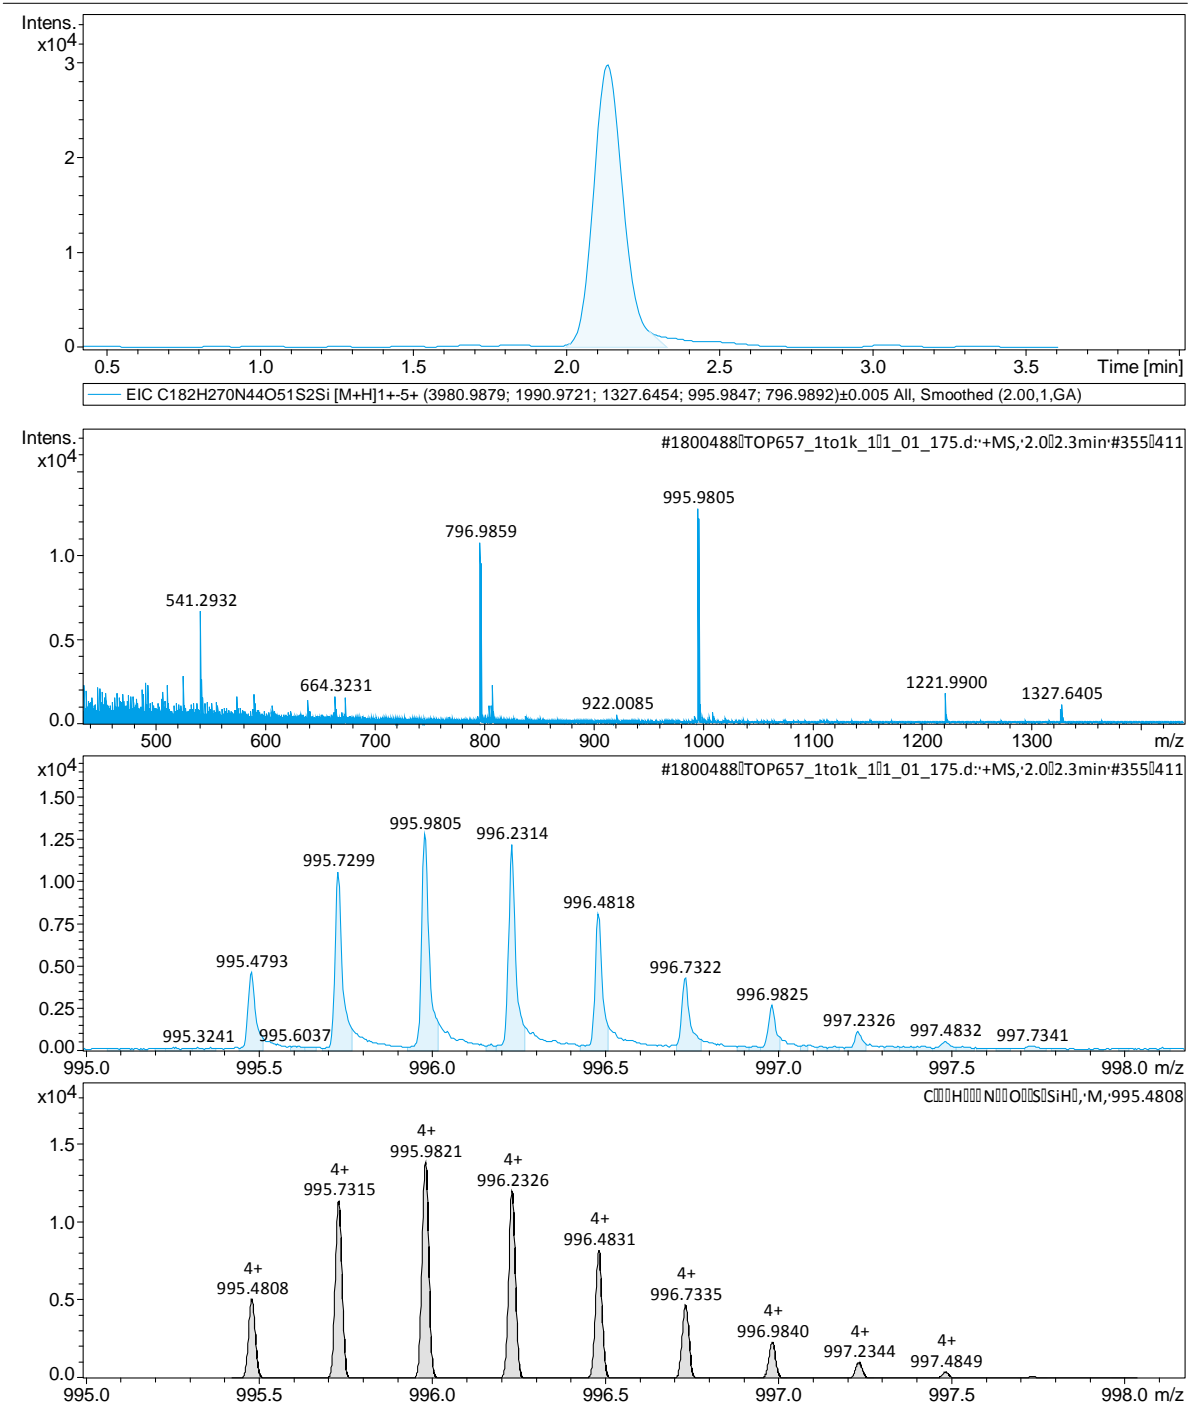

**Supplementary Figure 11. HR ESI-MS of LUXendin651.**



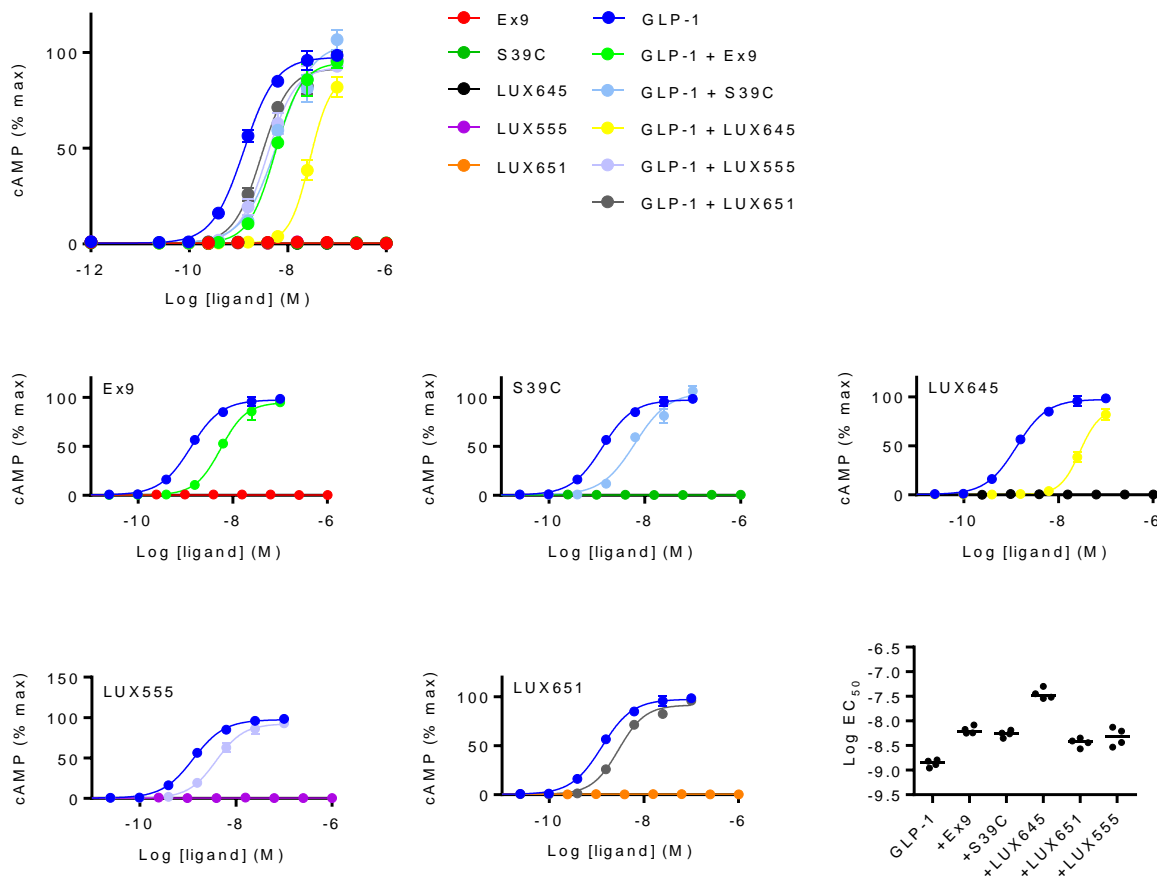

**Supplementary Figure 12: LUXendin645, LUXendin651 and LUXendin555 cAMP pharmacology.** HTRF cAMP assays in HEK-SNAP\_GLP1R cells in agonist and antagonist modes, stimulated with ligand for 30 min. Note that **LUXendins** are GLP1R antagonists (applied at 1  $\mu$ M), with little to no agonist activity ( $n = 4$  independent assays). Four-parameter fits are displayed, with  $\text{LogEC}_{50}$  estimates shown as individual replicates. GLP-1, glucagon-like peptide-1; Ex9, Exendin4(9-39); S39C, S39C\_Exendin4(9-39). Mean  $\pm$  SEM are shown. Source data are provided as a Source Data file.

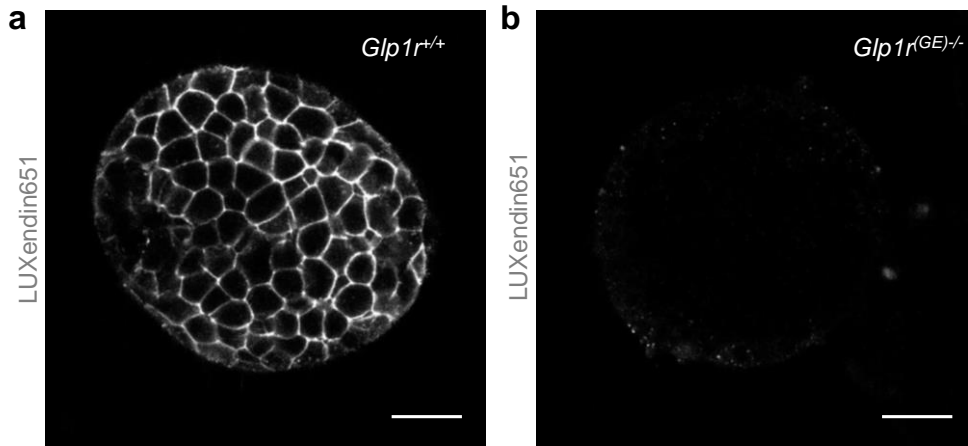

**Supplementary Figure 13: LUXendin651 specifically labels GLP1R. a, b** Signal can be detected in wild-type (**a**) but not *Glp1r<sup>(GE)-/-</sup>* islets (**b**) (n = at least 30 islets for each genotype, at least 6 animals per genotype, 3 preparations) (scale bar = 26.5  $\mu$ m). **LUXendin651** was applied at 100 nM.

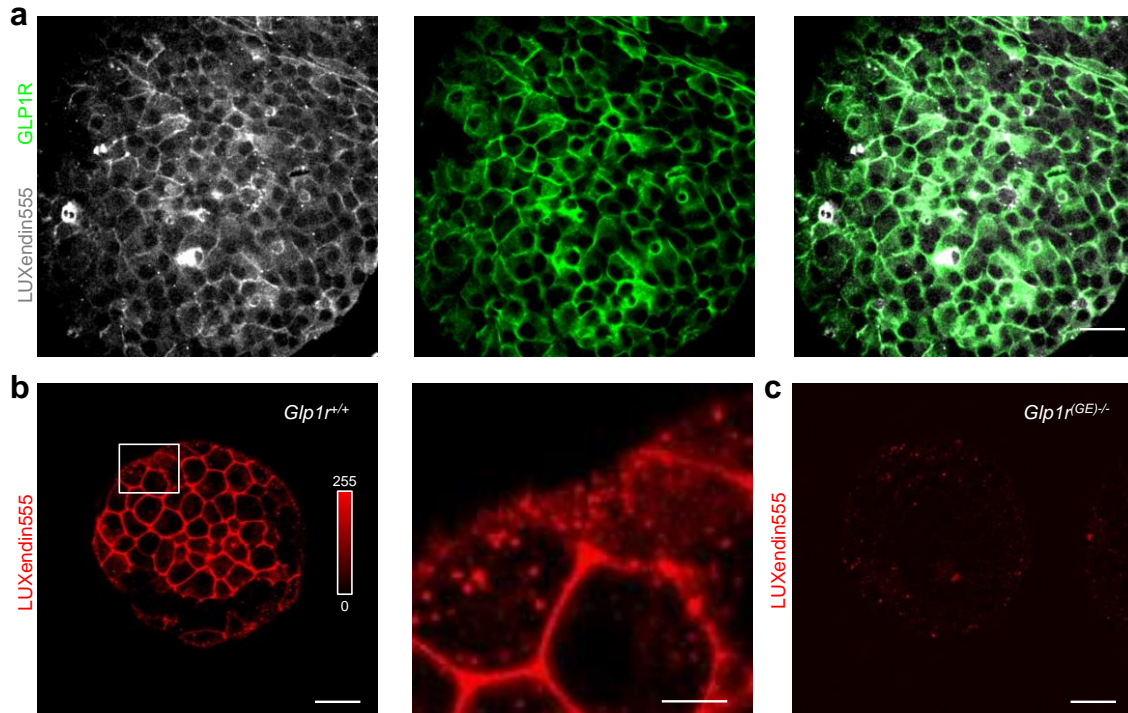

**Supplementary Figure 14: LUXendin555 specifically labels GLP1R.** **a** Some punctate staining is seen with 250 nM **LUXendin555** labeling, but not in the same samples co-stained with monoclonal antibody against GLP1R. **b, c** Signal can be detected in wild-type (**b**) but not *Glp1r*<sup>(GE)-/-</sup> islets (**c**) labelled with 250 nM **LUXendin555** (inset shows punctate staining) (n = at least 33 islets for each genotype, at least 6 animals per genotype, 3 preparations) (scale bar = 26.5  $\mu$ m for full-field images, 6.5  $\mu$ m for zoomed-in image). Note that the brightness/contrast in image (**c**) has been increased relative to image (**b**) to allow the *Glp1r*<sup>(GE)-/-</sup> islet to be seen. The white box shows the location of the zoom-in.

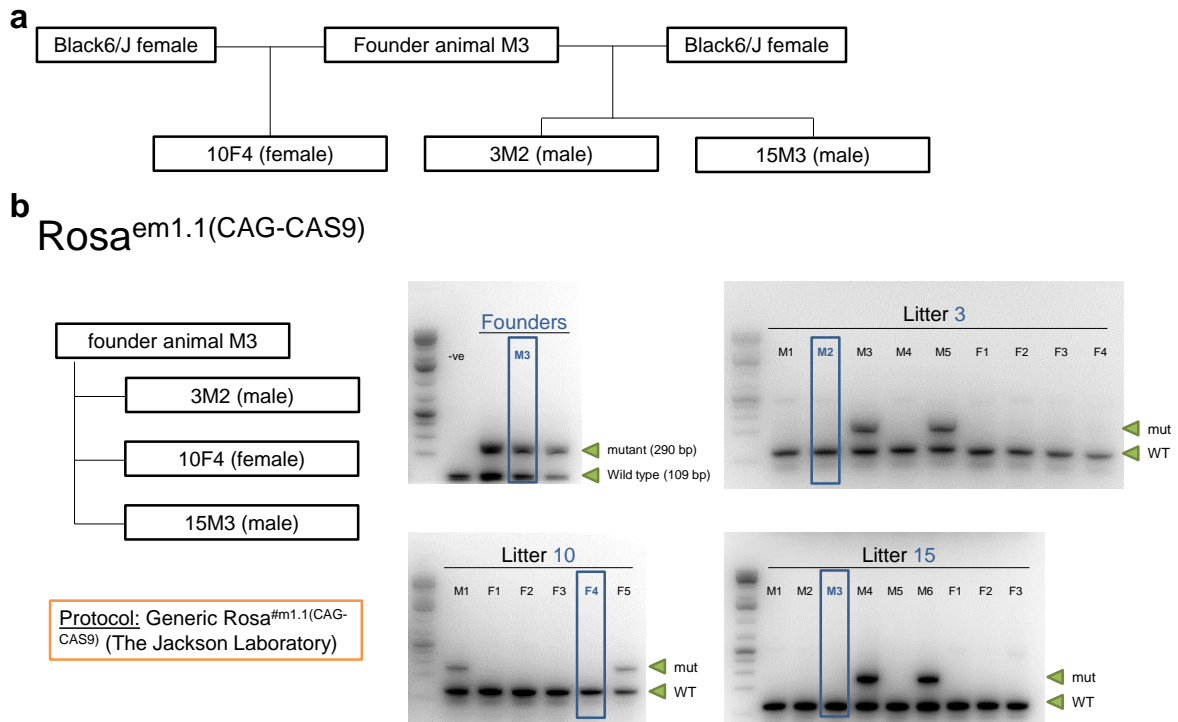

**Supplementary Figure 15: Breeding strategy for  $Glp1r^{(GE)-/-}$  mice.** **a** The founder animal carrying a mutant  $Glp1r$  allele was paired with two wild type (WT) Black6/J females. Three of their offspring (10F4, 3M2, 15M3) carrying the knock-out  $Glp1r$  allele were used for further breeding. **b** Founder animal M3 was heterozygous for  $Rosa^{em1.1(CAG-CAS9)}$ , as shown by PCR following The Jackson Laboratory protocol 'Generic  $Rosa^{#m1.1(CAG-CAS9)}$ '. None of the three offspring used for further breeding expressed the Cas9 protein. Full, uncropped gels are provided in the Source Data file.

a

Chr5:-35931971

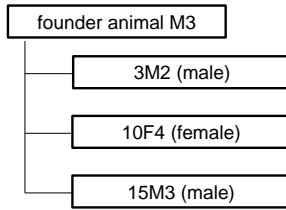

**Protocol:** amplified with forward primer 'ctcgaccogtgttacct' and reverse primer 'gcatgataccactcccacc' from genomic DNA, PCR clean-up, sequencing with reverse primer

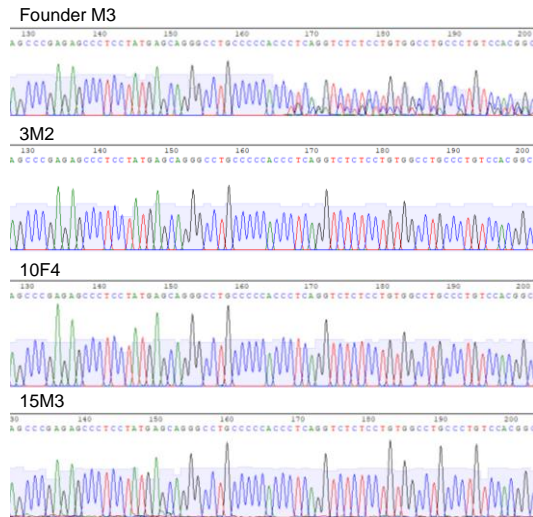

b

Chr5:+113593900

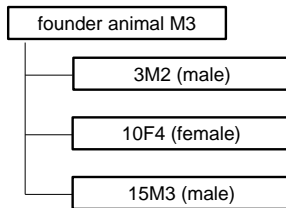

**Protocol:** amplified with forward primer 'gaacagtagaggctgatttga' and reverse primer 'tgtttaaccagtcagggtg' from genomic DNA, PCR clean-up, sequencing with reverse primer

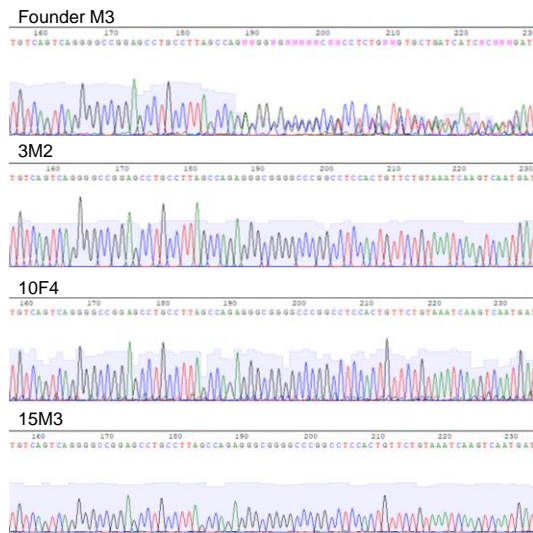

**Supplementary Figure 16: Screening *Glp1r*<sup>GE/-</sup> mice for off-target mutations. a** Amplification of chr5:-35931971 and sequencing of the resulting PCR product revealed changes after CRISPR/Cas9 genome editing in the founder animal M3. Offspring 3M2, 10F4 and 15M3 were analyzed in the same way and showed no off-target effects. **b** As for a, but amplification and screening of chr5:+113593900 showing a mutation after CRISPR/Cas9 genome editing in the founder animal but not in the next generation. Source data are provided as a Source Data file.

| Locus           | forward primer          | reverse primer        | Affected in Founder M3? |
|-----------------|-------------------------|-----------------------|-------------------------|
| chr9:-114887514 | GACTGCAAGGTTTCGAGGAGC   | CGGGAAATGCCTGACTCATAC | no                      |
| chr5:-35931971  | CTCTGACCCGTGTGTTACCT    | GCATGGATACCACTCCCACC  | yes                     |
| chr1:-138015670 | TGGAACAGAGCGGCATACTC    | AATAAGGGTCGTTTGGGAGCC | no                      |
| chr4:+71861176  | TAGACATCCAGTGGGAGGGG    | GAGCCGCCCGCAATGT      | no                      |
| chr4:+53051322  | AAGCGTTTTGATTTTTGTCTGGC | TGACGGGAAGAGAGCATGTG  | no                      |
| chr9:-53418526  | CCTCTCCTCCAATAGCAGTCC   | TCTCGGACTGCACGAAAAC   | no                      |
| chr5:+113593900 | GAACAGTAGAGGCTGGATTTTGA | TGTGTTAACCAGTCAGGGTGT | yes                     |
| chr5:+73647675  | TTTCCCAAACAGCACCTACC    | CAATCAGGAAGGCGAGTGG   | no                      |
| chr7:+4434126   | GCTGGTGAGAGCAGAAGAGACC  | GGGAGAATGAGCGACTTCGTG | no                      |
| chr2:-151931498 | GCCACCAAGGAAGAGGTATGG   | CCAGTCCGTCAAGGTCACAC  | no                      |

**Supplementary Table 1: Potential off-targets analyzed after CRISPR.** Loci were amplified around the potential off-target site with the shown forward and reverse primers, followed by PCR clean-up and sequencing of PCR products by using either forward or reverse primer.
