# Supplementary material for: Super-resolution microscopy compatible fluorescent probes reveal endogenous glucagon-like peptide-1 receptor distribution and dynamics
Source: PubMed Central journal article supplement (PMC6981144; doi:10.1038/s41467-020-14309-w), 2020-01-24
Supplement: 41467_2020_14309_MOESM3_ESM.pdf [file 41467_2020_14309_MOESM3_ESM.pdf]

### Description of Additional Supplementary Files

**File name:** Supplementary Movie 1

**Description:** Two-photon z-stack of **LUXendin645**-labeled islets (147  $\mu\text{m}$ ).

**File name:** Supplementary Movie 2

**Description:** Single-molecule localization microscopy in **LUXendin645**-labeled CHO-K1-SNAP\_GLP1R cells (95 nm per pixel) (20 frames per second).

**File name:** Supplementary Movie 3

**Description:** Single-molecule localization microscopy in **LUXendin651**-labeled CHO-K1-SNAP\_GLP1R cells (95 nm per pixel) (20 frames per second).

**File name:** Supplementary Movie 4

**Description:** Single particle tracking in **LUXendin651**-labeled CHO-K1-SNAP\_GLP1R cells (47.5 nm per pixel) (20 frames per second).
